# Supplementary material for: Deploying QTL-seq for rapid delineation of a potential candidate gene underlying major trait-associated QTL in chickpea
Source: PubMed Central journal article supplement (PMC4463844; doi:10.1093/dnares/dsv004), 2015-04-27
Supplement: supp_dsv004_dsv004supp_table1.pdf [file supp_dsv004_dsv004supp_table1.pdf]

**Table S1: SNPs genetically mapped on chromosome 1 used for seed weight targeted traditional QTL mapping in chickpea**

| SNP IDs | Desi chromosomes      | Physical positions (bp) | SNPs/SSRs | Upstream 200-bp flanking sequences/Forward primers (5'-3')                                                                                                                                                                   | Downstream 200-bp flanking sequences/Reverse primers (5'-3')                                                                                                                                                                    | Genetic positions (cM) |
|---------|-----------------------|-------------------------|-----------|------------------------------------------------------------------------------------------------------------------------------------------------------------------------------------------------------------------------------|---------------------------------------------------------------------------------------------------------------------------------------------------------------------------------------------------------------------------------|------------------------|
| CaSNP1  | <i>Ca-desi</i> -chr01 | 382862                  | (T/C)     | TTATGGTTAACATCACTGTTCTATTTTTTAATTATCTT<br>TCAGGAAAGTTGGAAAGAAGACGGCAGATGCCAT<br>ATCACATGCATATAAATCTTGAGCTCTGGAATCAGT<br>GCATCTTATATCTGCTATGCTGCTGGAAGTTCCTAAT<br>ATGGCAGCCAATGTTTCATGATGCAAAGCGTAAGATC<br>ATTAGTAAGAATTTCCG  | CGTTGCTGGAGATCAGTGAGAAACAAACATTCAGTGG<br>TCCTCCTGAAAATGTTCCGGGATCATGTTATGGCTGCCAC<br>GAGGGCTCTTAGTAAAGGAGACTTCAACAAGGCTTTTG<br>ACATTATTGCATCTCTTGATGTATGGAAATTTGTGAAAA<br>ATCGAGATGCCGTGCTAGAAATGCTGAAGGACAAAAT<br>CAAGGAGGAG   | 0                      |
| CaSNP2  | <i>Ca-desi</i> -chr01 | 382898                  | (T/C)     | CTTTGAGGAAAGTTGGAAAGAAGACGGCAGATGCC<br>ATATCACATGCATATAAATCTTGAGCTCTGGAATCA<br>GTGCATCTTATATCTGCTATGCTGCTGGAAGTTCCTA<br>ATATGGCAGCCAATGTTTCATGATGCAAAGCGTAAGA<br>TCATTAGTAAGAATTTCCGTCGCTTGCTGGAGATCAG<br>TGAGAAACAAACATTCAC | GGTCTCCTGAAAATGTTCCGGGATCATGTTATGGCTGC<br>CACGAGGGCTCTTAGTAAAGGAGACTTCAACAAGGCTT<br>TTGACATTATTGCATCTCTTGATGTATGGAAATTTGTGA<br>AAAATCGAGATGCCGTGCTAGAAATGCTGAAGGACAA<br>AATCAAGGAGGAGGCACTTAGGACATACCTATTTACCT<br>TCTCTTCATCG   | 1.1                    |
| CaSNP3  | <i>Ca-desi</i> -chr01 | 527099                  | (A/G)     | AATAAGAAATTTGGGTTATCATTAGCATTCTTTGTA<br>ACTTCTTCATTCTCTTTCACTGTCAATTTCTACTTGT<br>TAAAGTGCTGACACTGAAAGTTTCTATGATTTGTTCT<br>CATTCTTGCTGTATGCTCTAAATTTGCAGGCTCGGTAT<br>TTCTCCAGCAGCTCATCTCAGGAGTTAGCTACTGCC<br>ATTGCATGGTAA     | TTTAGTTTTTTtGTTTTTTtCAATGTGTTGGTGGTTTTTt<br>GCCTGTCTTTGGGGTTATTTtCTATGTAATTTtCTTCT<br>TTTGCAGCAAATCTGCCATCGAGACTTGAAGCTCGAGA<br>ACACCTTATTGGATGGGAACCCTGCCCCGCGGCTCAA<br>ATTTGCGATTTTGGTTATTCTAAGGTTCAAGTTATGGAGT<br>AAT        | 1.4                    |
| CaSSR1  | <i>Ca-desi</i> -chr01 |                         | (TA113)   | TCTGCAAAAATATTACGTTAATACCA                                                                                                                                                                                                   | TTGTGTGTAATGGATTGAGTATCTCTT                                                                                                                                                                                                     | 2.2                    |
| CaSNP4  | <i>Ca-desi</i> -chr01 | 527113                  | (G/T)     | GTTATCATTAGCATTCTTTGTAACCTTCTCATTCTCTT<br>TTCACTGTCAATTTCTACTTGTAAAGTGCTGACACT<br>GAAAGTTTCTATGATTTGTTTCTCATTCTTGCTGTATG<br>CTCTAAATTTGCAGGCTCGGTATTTCTCCAGCAGCTC<br>ATCTCAGGAGTTAGCTACTGCCATTGCATGGTAAATT<br>TAGTTTTTTt     | TTTTTTtCAATGTGTTGGTGGTTTTtGCCTGTCTTTGG<br>GGTTATTTtCTATGTAATTTtCTCTTTTGCAGCAAATC<br>TGCCATCGAGACTTGAAGCTCGAGAACACCTTATTGGA<br>TGGAACCTGCCCCGCGGCTCAAATTTGCGATTTTG<br>GTTATTCTAAGGTTCAAGTTATGGAGTAATTTCAATGCCA<br>AATG           | 2.6                    |
| CaSNP5  | <i>Ca-desi</i> -chr01 | 527176                  | (T/C)     | AAAGTGCTGACACTGAAAGTTTCTATGATTTGTTTCT<br>CATTCTTGCTGTATGCTCTAAATTTGCAGGCTCGGTAT<br>TTCTCCAGCAGCTCATCTCAGGAGTTAGCTACTGCC<br>ATTGCATGGTAAATTTAGTTTTTTtGTTTTTTtCAAT<br>GTGTTGGTGGTTTTtGCCTGTCTTTGGGGTATTTTt<br>CTATGTAATTT      | tCTCTTTTGCAGCAAATCTGCCATCGAGACTTGAAGCT<br>CGAAGACACCTTATTGGATGGGAACCCTGCCCCGCGGC<br>TCAAAATTTGCGATTTTGGTTATTCTAAGGTTCAAGTTAT<br>GGAGTAATTTCAATGCCAAATGATTTGAATAAATTTATT<br>GAAGTCATACTTGACGTGTTTTtCTCTGACAACATTTTtG<br>TTTTtCT  | 2.8                    |
| CaSNP6  | <i>Ca-desi</i> -chr01 | 527181                  | (C/A)     | GCTGACACTGAAAGTTTCTATGATTTGTTTCTCATTCT<br>TGCTGTATGCTCTAAATTTGCAGGCTCGGTATTTCTC<br>CAGCAGCTCATCTCAGGAGTTAGCTACTGCCATTGCA<br>TGGTAAATTTAGTTTTTTtGTTTTTTtCAATGTGTTG<br>GTGGTTTTtGCCTGTCTTTGGGGTATTTtCTATGT<br>AATTTTTtCTT      | TTTTGCAGCAAATCTGCCATCGAGACTTGAAGCTCGAG<br>AACACCTTATTGGATGGGAACCCTGCCCCGCGGCTCAA<br>AATTTGCGATTTTGGTTATTCTAAGGTTCAAGTTATGGAG<br>TAATTTCAATGCCAAATGATTTGAATAAATTTATTGAAGT<br>CATACTTGACGTGTTTTtCTCTGACAACATTTTtGTTTTtC<br>TAGTCA | 3.3                    |

| SNP IDs | Desi chromosomes | Physical positions (bp) | SNPs/SSRs | Upstream 200-bp flanking sequences/Forward primers (5'-3')                                                                                                                                                                  | Downstream 200-bp flanking sequences/Reverse primers (5'-3')                                                                                                                                                                | Genetic positions (cM) |
|---------|------------------|-------------------------|-----------|-----------------------------------------------------------------------------------------------------------------------------------------------------------------------------------------------------------------------------|-----------------------------------------------------------------------------------------------------------------------------------------------------------------------------------------------------------------------------|------------------------|
| CaSNP7  | Ca-desi -chr01   | 538086                  | (G/T)     | CAGCACAAGGTCTTCAAATTCCTCAGCTCAATTGGTT<br>GCAGCATGCTAATGCTCACCACAATTTCTCGTCCCAG<br>GCCAAGTTTTGACCTCAAATTTCTTTCTCTATTCCA<br>ACTCACAACCTTCTCCAACGATGGGAGTGCCAGG<br>TATGTTATGCCTTTAGTCTTTAAAACAACAATTTTT<br>tCTCTCCCTTTT        | TTTTGGTATGCAGCAATCTTAGTGCTATTTGTCTTATG<br>ACATTGTATAGTGGGTAGTTTTTGTcACTAGAGAAAA<br>GTTCTTAGACAATGCCATATCCTGATTTTGTAGCCTTTT<br>GCATATCATTACCAGCCTATTTAGATATTATACTAGAA<br>CCCTATTGATAGAGATATATAGTATATAACATAACAAG<br>GATATAAG  | 3.7                    |
| CaSNP8  | Ca-desi -chr01   | 836859                  | (G/A)     | GGTTGGTTATATTATTGTTATGTTTTGCAATATTTTAA<br>TATTTTAGGGTTTTAATGTTGTGTTGTGATATTGCAGC<br>AACAGTGCTCGCTTTCTATGGAAATCGATTCTTCTTC<br>AATCAAAGAAACCAACCCGAAGTCACTGCTGTGTG<br>GAAAATTGGTCAACAGCTTTGGTTACGGAECTATTCC<br>GGAGTACATGAGGC | ATCCGTGGGTTTGAATGGAGTCAGGAECTCAGGGATT<br>TGTTGCTGCTTTCTCAGGCAAAGCATTTAAGATTTTCTG<br>TTTTGTCTATTAGCAGAGCTGCGATTGTTCTGTACAAA<br>CTCTTTGATCTTCACTATATTTAATGCATGATTCTATTCA<br>CTTTATCTTCAATTTGAATATAATTTTAAAGCTCTAACTG<br>GATGA | 3.9                    |
| CaSSR2  | Ca-desi -chr01   |                         | (TR43)    | AGGACGAAACTATTCAAGGTAAGTAGA                                                                                                                                                                                                 | AATTGAGATGGTATTAATGGATAACG                                                                                                                                                                                                  | 4.1                    |
| CaSNP10 | Ca-desi -chr01   | 872247                  | (G/A)     | AAGAGAAACATAACCACAACAACAGTTTTGATTAGTT<br>CACCTTAAAAATCTCTCTTCTCATGATTAACCTATTC<br>ACAAGCCAACCTGGTGTCAAAGCTGCTCAAGCATATT<br>GCAAAAGCTTGAATGCAGATAAAGGATATCGATAA<br>TCCATGGTGAACATATCTTTCCCACTTTGCCAAATTG<br>CAGAATAATCTTATC  | TGTTCCGGTGGAGCTGGTTGAGATGGTGTGGCGCGC<br>CAGCCGGTGGTTGAGTTGCAGCAATCAGCTGAAAGTTT<br>TTAACAGATGCAACTGTTACTCGTCCCCGAAATTAAG<br>ACACCAGCATTGTAAGTTCATGCCATCTAGGAGTTT<br>GTTTTtCAGAACCAAAGGTCTCGTCTTGCCATCATCGTC<br>GTCATTAATA    | 4.5                    |
| CaSNP11 | Ca-desi -chr01   | 872280                  | (C/T)     | AGTTCACCTTAAAAATCTCTCTTCTCATGATTAACCT<br>ATTCACAAGCCAACCTGGTGTCAAAGCTGCTCAAGCA<br>TATTGCAAAAGCTTGAATGCAGATAAAGGATATCG<br>ATAATCCATGGTGAACATATCTTTCCCACTTTGCCAA<br>ATTGCAGAATAATCTTATCGTGTCCGGTGGAGCTGG<br>TTGAGATGGTGTGG    | GCGCCAGCCGGTGGTTGAGTTGCAGCAATCAGCTGAA<br>AGTTTTTAACAGATGCAACTGTTACTCGTCCCCGAAAT<br>TAAGACACCAGCATTGTAAGTTCATGCCATCTAGGA<br>GGTTTTTTTTtCAGAACCAAAGGTCTCGTCTTGCCATCA<br>TCGTGCTCATTAAATAATGGAACCCCGATTTCAGAAAA<br>CCGTGAACTG  | 4.7                    |
| CaSSR3  | Ca-desi -chr01   |                         | (TA8)     | AAAATTTGCACCCACAAAATATG                                                                                                                                                                                                     | CTGAAAA (TAA)44TTATGGCAGGGAAAC                                                                                                                                                                                              | 5                      |
| CaSNP12 | Ca-desi -chr01   | 1904458                 | (G/A)     | GCTCTGTTTTGTGTTAGTGTACTTAGCAATTGCATTA<br>TCTTGGTTGTGCTGATAAGTGATACTCAAGTTGGTGT<br>TTTTCATGACAATTTTCAAGCAGATAAATGCGTATTG<br>ATATAGTGAGTGTGAATCTGAGCTTAGCTGCACCTAA<br>ATCATGTTTGACAACTCAAGACAATGAGGGAAGGA<br>GAATCATCTAAGATAA | ATTTATATATATGTCTTTGAATTATTACTTTCATCAAG<br>AACCAGATGCTGCAACCCGTTCTCGATTCTCTTGTAT<br>TATACGGAAGGAAGACCCATGTTATTATTTAAGAAGA<br>TTATATTCTTTGTATGCAACTGAAATTGAACAGCGTGC<br>CAATTTGATTGACTCTTTCTAATTAATTATATGGTGA<br>GATAT        | 5.5                    |

| SNP IDs | Desi chromosomes      | Physical positions (bp) | SNPs/SSRs | Upstream 200-bp flanking sequences/Forward primers (5'-3')                                                                                                                                                                     | Downstream 200-bp flanking sequences/Reverse primers (5'-3')                                                                                                                                                                    | Genetic positions (cM) |
|---------|-----------------------|-------------------------|-----------|--------------------------------------------------------------------------------------------------------------------------------------------------------------------------------------------------------------------------------|---------------------------------------------------------------------------------------------------------------------------------------------------------------------------------------------------------------------------------|------------------------|
| CaSNP13 | <i>Ca-desi</i> -chr01 | 1904473                 | (C/T)     | TAGTGTACTTAGCAATTGCATTATCTTGGTTGTGCTG<br>ATAAGTGATACTCAAGTTGGTGTTCATGACAATT<br>TTCAAGCAGATAAATGCGTATTGATATAGTGAGTGT<br>GAATCTGAGCTTAGCTGCACCTAAATCATGTTTGACA<br>AACTCAAGACAATGAGGGAAGGAGAATCATCTAAGA<br>TAAGATTTATATATATGT     | TTTGAATTATTACTTCATCAAGAACCAGATGCTGCA<br>ACCCGTTCTCGATTCTCTTGTATTATACGGAAGGAAG<br>ACCCATGTTATTATTTAAGAAGATTATATTCTTTGTATG<br>CAACTTCAAATTGAACAGCGTGCCAATTTTGATTGACT<br>CTTTCCTAATTAATTATATGGTGAGATATGAGAGTTGA<br>GGAATC          | 5.9                    |
| CaSNP14 | <i>Ca-desi</i> -chr01 | 1906298                 | (A/C)     | AACACTCGCAGATACCAAATTTGTTTCTATAATCCTAA<br>ATCGAGTCTCTTACGAAAATCTAGTTAATCTTGACACA<br>AACAGGACTTTTGAAGATCATGTTAGATGCATTTATA<br>TCGGGATAAAAATAATGTTTGCATGAAAGGTTAGCT<br>CCTACTATAGGAAATTGGAGACCCTTTTCAGCTGCAG<br>TATGGTGCTGTAGCTA | ATAGGATCCACACTTTTCCCTCTGCACCCCcTACATCCTC<br>TCTATCTCTTTCTAATTTtCTTCGCTGATTGTCTCTAAAT<br>TTTTTCATCATCTACTCTCTTCTCATTGTCTTATTtGCGCTA<br>TAGATGATGCACAGCAGCAGAGGATTCAAGCTCATGG<br>AAGCCTACCTGCTCAATTCTACGGTGAAAAATGTGTCTC<br>AAG   | 6.2                    |
| CaSNP15 | <i>Ca-desi</i> -chr01 | 1906300                 | (T/G)     | CACTCGCAGATACCAAATTTGTTTCTATAATCCTAAAT<br>CGAGTCTCTTACGAAAATCTAGTTAATCTTGACACAAA<br>CAGGACTTTTGAAGATCATGTTAGATGCATTTATATC<br>GGGATAAAAATAATGTTTGCATGAAAGGTTAGCTCC<br>TACTATAGGAAATTGGAGACCCTTTTCAGCTGCAGTA<br>TGGTGCTGTAGCTAAA | AGGATCCACACTTTTCCCTCTGCACCCCcTACATCCTCTC<br>TATCTCTTTCTAATTTtCTTCGCTGATTGTCTCTAAATTT<br>TTCATCATCTACTCTCTTCTCATTGTCTTATTtGCGCTATA<br>GATGATGCACAGCAGCAGAGGATTCAAGCTCATGGAA<br>GCCTACCTGCTCAATTCTACGGTGAAAAATGTGTCTCAA<br>GAA    | 6.5                    |
| CaSNP16 | <i>Ca-desi</i> -chr01 | 1906308                 | (A/G)     | GATACCAAATTTGTTTCTATAATCCTAAATCGAGTCTC<br>TTACGAAAATCTAGTTAATCTTGACACAAACAGGACTT<br>TTGAAGATCATGTTAGATGCATTTATATCGGGATAAA<br>AATAATGTTTGCATGAAAGGTTAGCTCCTACTATAGG<br>AAATTGGAGACCCTTTTCAGCTGCAGTATGGTGCTGT<br>AGCTAAATAGGATCC | CACTTTTCCCTCTGCACCCCcTACATCCTCTCTATCTCTTT<br>CTTAAATTTtCTTCGCTGATTGTCTCTAAATTTTTTCATCATC<br>TACTCTCTTCTCATTGTCTTATTtGCGCTATAGATGATGC<br>ACAGCAGCAGAGGATTCAAGCTCATGGAAGCCTACCT<br>GCTCAATTCTACGGTGAAAAATGTGTCTCAAGAACCCG<br>TTAA | 6.8                    |
| CaSNP17 | <i>Ca-desi</i> -chr01 | 1906363                 | (G/A)     | ATCTTGACAAACAGGACTTTTGAAGATCATGTTAGA<br>TGCATTTATATCGGGATAAAAATAATGTTTGCATGAA<br>AGGTTAGCTCCTACTATAGGAAATTGGAGACCCTTTT<br>CAGCTGCAGTATGGTGCTGTAGCTAAATAGGATCCA<br>CACTTTTCCCTCTGCACCCCcTACATCCTCTCTATCTCT<br>TTCTTAATTTtCTTC   | CTGATTGTCTCTAAATTTTTCATCATCTACTCTCTTCTCAT<br>TGTCTTATTtGCGCTATAGATGATGCACAGCAGCAGAG<br>GATTCAAGCTCATGGAAGCCTACCTGCTCAATTCTACG<br>GTGAAAAATGTGTCTCAAGAACCCGTTAAAGTGTGTTGA<br>TTCCGGTGAATTTTCGCAATTTCTCGTGCAATTTTtCtAg<br>CAAACC  | 7.5                    |

| SNP IDs | Desi chromosomes      | Physical positions (bp) | SNPs/SSRs | Upstream 200-bp flanking sequences/Forward primers (5'-3')                                                                                                                                            | Downstream 200-bp flanking sequences/Reverse primers (5'-3')                                                                                                                                               | Genetic positions (cM) |
|---------|-----------------------|-------------------------|-----------|-------------------------------------------------------------------------------------------------------------------------------------------------------------------------------------------------------|------------------------------------------------------------------------------------------------------------------------------------------------------------------------------------------------------------|------------------------|
| CaSNP18 | <i>Ca-desi</i> -chr01 | 2067290                 | (C/A)     | TTTCGAGGAGTCAGGAAGAGGCCATGGGGAAGATACGCCGCGAGATTAGAGATCCGGGAAAGAAGAGCCGCGTTTGGCTCGGCACTTTCGACACGGCGGAAGAGGCTGCACGAGCCTACGACACCGCCGACGTGATTTCCGTGGTTCTAAGGCTAAAATAACTTCCCTTACCTTCCGAAAATATAAAGATCCAAAGT | CTAGCCAAAGCAGCACCGTTGAATCCTCCAGCCGCGACCGTGACGCCGCCGCGGATGAATCTTATCCGCTTGACCTTAATTATCCCCGCTATCAACGGCTCCGTTTCAATTTCTTTTTCAGCATCGTTTCCCGTCGATGCCGCCAGCTGACAAATTTTTtAtATGACACCGTCGTACGCGCCGGCATGGTGAATTCCC     | 8.4                    |
| CaSNP19 | <i>Ca-desi</i> -chr01 | 2084506                 | (G/T)     | TCCTAAATAAGACGCAGTTGAGGTGTGCTCAGCCACCTGAACTCCACCGGAGACAGAAAAAGCACCGTCATGACGCTAAGTCCAGCGACCGCAGCAACAGGTGGAGGCTGAGGAGTGTAAAATCCTTGAGAACTCCAGTCTGAAGAACTCAGTCACGACGAAGCTGCGGAAGGGACAGGGCGCCATCGGTGATCAGA | GAAGGAGCGTTGAGATCAAGACAAAGACCAGCGGCAACCGGCGCCGGAGGAAAGTtAGTTTTAGCCTTAGCTCCACGGAGGGAACGAGCGGCGCCGTCGTAAGCAAGAGCAGCTTCTCGGGAGTATCAAATGTTCCCAACCAACACGTGTCTTCTTCAAGGATCGCGAATCTCAGCTGCATAGCGTCCCCATGGTCCG     | 9.6                    |
| CaSNP20 | <i>Ca-desi</i> -chr01 | 2213694                 | (C/T)     | CTAATTTCTGTGAATGTAGGTCCTCTGAAGTTAGTATCTCGTGGAGTCGCCATTCTTCTCTTCAAACACTCAGCAGAGACTGCGGCTCGTTTCTCAGTTCAGTCACAGCACAGCAGCCAAAAGAGCCTCCTGGTCTTTGACAA TTGTTGTAAGACTAGCTTTGTGTTACCTGCATTGAGAAAACCTGGCTGCAA   | GCGGCGGACCTGGGGAGTCAATATATGTGTACTGGTTATTATACAACAAAGGATTGCCACGTCTGTTGAATTGATCAAACCTGTAAGTATTATCGTGATAGAGGAAATTTTCA TGATTTTTCAGGACTCGGAGTATTCATATAAGTCGGATGCATATAATTGTTGGCCCTCTCGGGTTTGTGTTTTGTCTGTACCAATGC  | 9.8                    |
| CaSNP21 | <i>Ca-desi</i> -chr01 | 2213700                 | (C/T)     | TCCTGTGAATGTAGGTCCTCTGAAGTTAGTATCTCGCTGGAGTCGCCATTCTTCTCTTCAAACACTCCAGCAGACTGCGGCTCGTTTCTCAGTTCAGTCACAGCAGCAGCCAAAAGAGCCTCCTGGTCTTTGACAATTGTTGTAAAGACTAGCTTTGTGTTACCTGCATTGAGAAAACCTGGCTGCAACGGCGG    | GGACCTGGGGAGTCAATATATGTGTACTGGTTATTATACAACAAAGGATTGCCACGTCTGTTGAATTGATCAAACCTGTAAGTATTATCGTGATAGAGGAAATTTTTCATGATTTTCAGGACTCGGAGTATTCATATAAGTCGGATGCATATAA TTGTTGGCCCTCTCGGGTTTGTGTTTTGTCTGTACCAATGCAGCCAT | 10.5                   |
| CaSNP22 | <i>Ca-desi</i> -chr01 | 2213762                 | (T/C)     | AACACTCCAGCAGAGACTGCGGCTCGTTTCTCAGTTCAGTACAGCAGCAGCAGCCAAAAGAGCCTCCTGGTCTTTGACAATTGTTGTAAGACTAGCTTTGTGTTACCTGCATTGAGAAAACCTGGCTGCAACGGCGGACCTGGGAGTCAATATATGTGACTGGTTATTATACAACA AAGGATTGCCACGTCTGT   | GAATTGATCAAACCTGTAAGTATTATCGTGATAGAGGA AATTTTTCATGATTTTTCAGGACTCGGAGTATTCATATAAGTCGGATGCATATAAATTGTTGGCCCTCTCGGGTTTGTGTTTGTCTGTACCAATGCAGCCATTCCGAAGAAGTCATTTGTTGTTGGAGGGTATCCACCGAAGAAAACCGGATATCTAGGATC  | 12.6                   |

| SNP IDs | Desi chromosomes      | Physical positions (bp) | SNPs/SSRs | Upstream 200-bp flanking sequences/Forward primers (5'-3')                                                                                                                                                                    | Downstream 200-bp flanking sequences/Reverse primers (5'-3')                                                                                                                                                                 | Genetic positions (cM) |
|---------|-----------------------|-------------------------|-----------|-------------------------------------------------------------------------------------------------------------------------------------------------------------------------------------------------------------------------------|------------------------------------------------------------------------------------------------------------------------------------------------------------------------------------------------------------------------------|------------------------|
| CaSNP23 | <i>Ca-desi</i> -chr01 | 2213817                 | (A/G)     | AAAAGAGCCTCTGGTCTTTGACAATTGTTGTAAAGA<br>CTAGCTTTGTGTTACCTGCATTGAGAAAACCTGGCT<br>GCAACGGCGGCGGACCTGGGGAGTCAATATATGTGT<br>ACTGGTTATTACAACAAAGGATTGCCACGTCTGTT<br>GAATTGATCAAACCTGTAAGTATTATCGTGATAGAG<br>GAAATTTTCATGATTTTC     | GGACTCGGAGTATTCATATAAGTCGGATGCATATAATT<br>GTTGGCCCTCTCGGGTTTGTGTTTTGTCTGTACCAATG<br>CAGCCATTCCGAAGAAGTCATTTGTCCGTGTGGAGGGT<br>ATCCACCGAAGAAAACCGGATATCTAGGATCATATCCA<br>GGTGGTCTATATGTAGAACTCCAATCTGAGTAACCGCT<br>TATTGGTGCC | 13.6                   |
| CaSNP24 | <i>Ca-desi</i> -chr01 | 2214019                 | (A/G)     | GGACTCGGAGTATTCATATAAGTCGGATGCATATAAAT<br>TGTTGGCCCTCTCGGGTTTGTGTTTTGTCTGTACCAA<br>TGCAGCCATTCCGAAGAAGTCATTTGTCCGTGTGGA<br>GGGTATCCACCGAAGAAAACCGGATATCTAGGATCA<br>TATCCAGGTGGTCTATATGTAGAACTCCAATCTGAGT<br>AACCGCTTATTGGTGCC | AGTTTTCTGAAATTTAGAAGCAGATAAACTAGTTGT<br>GCTTGTGCATTAGTAAACCAAGCAGCATTATCAGGTAA<br>TAATGGAGCAGAGGGTACTGGAAGAGAATATGTGGTA<br>GCAGAAGAGGCATTGTAGTTTGAAGATTCATTCTTTGA<br>GCTAATGACTGAATCTTCATTTTTATTGATGGATAGACT<br>TGCCAAAGATG  | 15.6                   |
| CaSNP25 | <i>Ca-desi</i> -chr01 | 2214038                 | (A/T)     | AAGTCGGATGCATATAATTGTTGGCCCTCTCGGGTTT<br>GTTGTTTTGTCTGTACCAATGCAGCCATTCCGAAGAA<br>GTCATTTGTCCGTGTGGAGGGTATCCACCGAAGAAA<br>ACCGGATATCTAGGATCATATCCAGGTGGTCTATATG<br>TAGAACTCCAATCTGAGTAACCGCTTATTGGTGCCAA<br>GTTTTCTGAAATTTAG  | AGCAGATAAACTAGTTGTGCTTGTGCATTAGTAAACC<br>AAGCAGCATTATCAGGTAATAATGGAGCAGAGGGTAC<br>TGGAAGAGAATATGTGGTAGCAGAAGAGGCATTGTAG<br>TTTGAAGATTCATTCTTTGAGCTAATGACTGAATCTTCA<br>TTTTTATTGATGGATAGACTTGCCAAAGATGAAGAAGC<br>TATTTCTTCAAT | 18.9                   |
| CaSNP26 | <i>Ca-desi</i> -chr01 | 2292933                 | (T/C)     | TGATTAACACTGTCCGAAAGGTAGTAGTAATTTTTTT<br>TtCTTTTTTTTTtCCACATGATTTTTTGTAAATCTCCTTAT<br>ATAAATATTCCATGAATATTATTTTTCTTCTCCAAG<br>ATCAACACTGCTTAGTTTTCAGACTCAAGCAGCATTAT<br>TTAaaaAAAAAaaGAAATATATTGAATTTTCTGATCCC<br>TGATTTCTTCT | CTAAAAACCCTAAGGTTCAATTAGAGAACCCTAGATTC<br>ATTCATCCCCTGTTTGCAGCAAAAGGGGAAATTTATCTC<br>GTGAACAATTTTTGATTAGTGTATATAATCGAATTT<br>CAGTTTGGTTTTGTTTTCTCTCTGCTTCTGTAACCTGTGAT<br>TTGATTTTGTATTATTTCTGTTTCTGTTCAAACACTCATG<br>CATAG  | 20.6                   |
| CaSNP27 | <i>Ca-desi</i> -chr01 | 2349214                 | (C/A)     | CTTTTAGTAGAGACAGTATTGCACTCCATCATGAATG<br>TTAGCTAAATTGACTTAGTATTCAATGTCAATAAAAT<br>AATGGAAGGTTCTATCAAGCATTTTGTCTATAGTCTT<br>GTTTACATCTCTAATTTTTGTTCTTTCAATTTTGCAGGTG<br>TAAAACGTGTTGTAGATTTATGTGCTGCCCCAGGAAG<br>CTGGAGTCAGGTA | TGGTGATGAAATTACTGATCTCGCATATGAGTTGTT<br>CAGAGTCATACAGCCATTTATGATTCAACAACATATTTT<br>ATATTTAACACAACCATTCTCTAGCACTTTAGCTTCTCA<br>GAAATCAAAGCAGCTTCAACTTTTTTTACCAAACACAA<br>TTTATGGCTGTGTCGAAAAGCGCTAACATAAGAAAACA<br>TAGTGTC    | 22.5                   |

| SNP IDs | Desi chromosomes      | Physical positions (bp) | SNPs/SSRs | Upstream 200-bp flanking sequences/Forward primers (5'-3')                                                                                                                                                                    | Downstream 200-bp flanking sequences/Reverse primers (5'-3')                                                                                                                                                                   | Genetic positions (cM) |
|---------|-----------------------|-------------------------|-----------|-------------------------------------------------------------------------------------------------------------------------------------------------------------------------------------------------------------------------------|--------------------------------------------------------------------------------------------------------------------------------------------------------------------------------------------------------------------------------|------------------------|
| CaSNP28 | <i>Ca-desi</i> -chr01 | 2349258                 | (G/A)     | AATTGACTTAGTATTCAATGTCAATAAAAATAATGGAA<br>GGTTCTATCAAGCATTGTTCTATAGTCTTGTGTTACA<br>TCTCTAATTTTGTCTTTTCATTTTTGCAGGTGTAAC<br>GTGTTGTAGATTTATGTGCTGCCCCAGGAAGCTGGA<br>GTCAGGTACTGGTGATGAAATTATCACTGATCTCGCA<br>TATGAGTTGTTTCCAGA | TCATACAGCCATTTATGATTCAACAACATATTTTCATATTT<br>AACACAACCATTCTCTAGCACTTTAGCTTCTCAGAAATC<br>AAAAGCAGCTTCAACTTTTTTACCAAACACAATTTATG<br>GCTGTGTCGAAAAGCGCTAACATAAGAAAACATAGTGT<br>CAATGAGGTTGGCTCTCCAAGTAGCATTAAATGTAATT<br>GGCACAA  | 24.8                   |
| CaSNP29 | <i>Ca-desi</i> -chr01 | 2349306                 | (C/T)     | GCATTTTGTCTATAGTCTTGTGTTACATCTCTAATTTTG<br>TTCTTTTCATTTTTGCAGGTGTAACCGTGTGTTAGATT<br>TATGTGCTGCCCCAGGAAGCTGGAGTCAAGTACTGG<br>TGATGAAATTATCACTGATCTCGCATATGAGTTGTTT<br>AGAGTCATACAGCCATTTATGATTCAACAACATATTT<br>CATATTTAACACAA | CATTCTCTAGCACTTTAGCTTCTCAGAAATCAAAGCAG<br>CTTCAACTTTTTTACCAAACACAATTTATGGCTGTGTC<br>GAAAAGCGCTAACATAAGAAAACATAGTGTCAATGAG<br>GTTGGCTCTCCAAGTAGCATTAAATGTAATTGGCACAA<br>AGGCCTTGGTTGAAAACATATTTCCATGATTTCTCGTTT<br>TGCGGCAAA    | 24.9                   |
| CaSNP30 | <i>Ca-desi</i> -chr01 | 2541722                 | (T/C)     | ATTATGAAAAACAAaCCCAATATCAACTCCCACACT<br>CACCTAAGTCTCCCCAACCCACCTTCATGGCTGCTA<br>ACCCACCCTAAACCATCTTTCTTTAAGATTAGTTCTTC<br>CACCATTAAGATCCATTGAACCCTAACCTCCAAAAG<br>CATGACTAAGCTCCACCATCAAAGATCCACTGGATCT<br>AACACCCAAAAGAGT    | GAACCAACCTCATAGAATGCAGCTGCGAGAACCATAG<br>AAGTTCAAGCAGTGGGATAACAACATCATCGCTCATT<br>TGCAAGAACAACCTTGAGAGCATAAATGCGAGTGGTTC<br>ATCATGAATGAAGTTCACTAGATGCAAGAGATTCAAAA<br>CAAACCTTGCTTCTTGTGGGGAAGCACACGACTTGATC<br>ATGGAGTTTCCAA  | 25.4                   |
| CaSNP31 | <i>Ca-desi</i> -chr01 | 2553120                 | (A/C)     | GTGCCAGCAAAGCTTTTTGGAAGAATTGGAGAGGAC<br>TGTTGCACTGCTTGCTTTGAAGATGTTTCTAATTGTC<br>CTGTTGGAGAGCTTCTCGACATATCACAGCGTCTAAA<br>AACAGCAAGCGAGGTGAATGCAGCTATACTTACAAG<br>CCAGAGTCATGAAAAAGGTTTGTGTTTTCTTCATAAA<br>TCTGTTTGTCTATAT    | TAACCTTGGTATGTGAATGGTTTTAAATACTGTTTTGCT<br>ACTTAGTTTATCTAAGAAATGTGTGTAATTTTtATGCATT<br>GCTGCATGTTGTGTGGTGATTAAGATATATTATTTATAT<br>ATATATGTTTATTGAATAGCTTGTGTTGTGTAATAATTT<br>GGGAACAAAATAGAAGCTTTGCCAGATTCACCCGATTA<br>AACAAAC | 26.8                   |
| CaSSR4  | <i>Ca-desi</i> -chr01 |                         | (GAA40)   | TTGACGCAGAGAACTCTCAA                                                                                                                                                                                                          | ATTGGTGTGATGGGTGGATT                                                                                                                                                                                                           | 28.9                   |
| CaSNP32 | <i>Ca-desi</i> -chr01 | 2553150                 | (C/T)     | GAGGACTGTTGCACTGCTTGCTTTGAAGATGTTTCT<br>AATTGTCCTGTTGGAGAGCTTCTCGACATATCACAGC<br>GTCTAAAAACAGCAAGCGAGGTGAATGCAGCTATAC<br>TTACAAGCCAGAGTCATGAAAAAGGTTTGTGTTTTCT<br>TCATAAATCTGTTTGTCTATATATAACTTTGGTATG<br>TGAATGGTTTTAAATA    | TGTTTTGCTACTTAGTTTATCTAAGAAATGTGTGTAATT<br>TTtATGCATTGCTGCATGTTGTGTGGTGATTAAGATATA<br>TTATTTATATATATATGTTTATTGAATAGCTTGTGTGTT<br>GTAAAATTTGGGAACAAAATAGAAGCTTTGCCAGATTC<br>ACCCGATTAACAACCACTATCCCcTGTGTGCTTGTGA<br>TGGTTT     | 30.5                   |

| SNP IDs | Desi chromosomes      | Physical positions (bp) | SNPs/SSRs | Upstream 200-bp flanking sequences/Forward primers (5'-3')                                                                                                                                                                   | Downstream 200-bp flanking sequences/Reverse primers (5'-3')                                                                                                                                                                 | Genetic positions (cM) |
|---------|-----------------------|-------------------------|-----------|------------------------------------------------------------------------------------------------------------------------------------------------------------------------------------------------------------------------------|------------------------------------------------------------------------------------------------------------------------------------------------------------------------------------------------------------------------------|------------------------|
| CaSNP33 | <i>Ca-desi</i> -chr01 | 2553187                 | (A/G)     | AATTGTCCTGTTGGAGAGCTTCTCGACATATCACAGC<br>GTCTAAAAACAGCAAGCGAGGTGAATGCAGCTATAC<br>TTACAAGCCAGAGTCATGAAAAAGTTTGTGTTTTCT<br>TCATAAATCTGTTTGTCTATATATAACTTTGGTATG<br>TGAATGGTTTTAAATACTGTTTGCTACTTAGTTTATC<br>TAAGAAATGTGTGTA    | TTTTtATGCATTGCTGCATGTTGTGTGGTGATTAAGATA<br>TATTATTTATATATATATGTTTATTGAATAGCTTGTGTG<br>TTGTAAAATTTGGGAACAAAATAGAAGCTTTGCCAGAT<br>TCACCCGATTAACAACCACTATCCCcTGTGTGCCTTGT<br>GATGGTTTATACCCGAAAAATCGATTAAACTTATAAC<br>GCTTGT    | 32.5                   |
| CaSNP34 | <i>Ca-desi</i> -chr01 | 2554326                 | (T/G)     | AGCTCTAGAGTTTGCTAATAGTATTTTTGTTCTCCAC<br>CAGACCCAAAACCTCCAAGCTTGTGAAGATGCTGTT<br>ATGGGCCCAAAACCAGCTGGATGAGAAAGCTACTTA<br>TCCTCGCATAAAAGATCTATCCACGGCTGCATTAGAA<br>GATCCTGTTTAAATTCTTGTAAACATTTTAAATTCAGTT<br>TGGAGAATTTTAGGT | CTAGATGAAGTGATTGTGGTCATTGGTGTAAAAATTG<br>TGTATTACTTTGATCGAAAAGATGTTTGATAACATTGATG<br>TTCGTTTTATCCTAGATAGCTGCTCCAGTGGTTTATACC<br>GTTGTACAAAAAGATTGTCAATACAGTTATTATCCATTC<br>ATTTTATCTTCAAGTTACCGATTATTAACATATTCTGTTG<br>CAACT | 33.6                   |
| CaSNP35 | <i>Ca-desi</i> -chr01 | 2555171                 | (C/G)     | AGAACATAAAAAaGGCTGCCTCAAGTCTTGATCCAAA<br>TGACATAAACCCAGGTTGTGCTGTCAATGCTTTGAA<br>CTCTTGAACAGGTGCATCTGCAATGAATTTCTTTGGC<br>ATAGTATCTCTAAGATAGGAAGAGGAACATCCATCA<br>TCAAAGTTAAGTGCATAGCTTGAAGGATCATATTGAA<br>ATTTTCGCCTCTGTTG  | CTCCATTGTTCAAAGCCCTTCTACTGCAGCTCTCATCCT<br>CCAAAACAAGCTCTACAACGTTTCTTTCCATAACCATT<br>CACCCATTGAAAGTTTTCCAACAAACCCATTTTGTCAA<br>GAAAGAAAGTTACAACTTTGAGCAATTTCTCAATGG<br>GTATTTATAATGAGGTTGAAAACCTTTCTGATAGTAAAC<br>AAGTGAT    | 34.2                   |
| CaSNP36 | <i>Ca-desi</i> -chr01 | 2573180                 | (A/C)     | GATATGACAATTAATTTTTCCACCTTAGTTTGGTTTA<br>ATATTAGTCTAAGTGTGTTGAATTTGTTCCAAGTCAC<br>AATGTGGTTTAATATTTTCCATTGTTGGGCTTTTGTAT<br>CATTTTACTATGTGATTAAGTTGGCTTTGGGCTGCTA<br>AGCCGAGAACCAGAAGACAACCTGCTTTCACAATTTA<br>ATTGAATGAGATT  | TTTTCTTAGCATAGCATGTTGTCTCAAAGCTTATAAT<br>TTTTGTGTCATGTTCAAATTGATCAATTTAAATGTATTTG<br>AAAACACAACGAGAATAATGAGTTGAACTTTTTCTTATT<br>ATTTGAGTATTTGTGAGAATGACTGAATGACATACAAG<br>ACTGTGGGTAGCTGCTAATGCCTTACCACAAGCTAAAG<br>GCAATGC  | 35.8                   |
| CaSNP37 | <i>Ca-desi</i> -chr01 | 3953451                 | (C/T)     | CCATCTAGGAGATTGAGGAATGAAGAACAGACCAAG<br>CAGCAAGCAAATGCAAGGCACTAATCCTTCAAAGT<br>TCAAAAAGCCAAACCAATCAACAGTTAGATATCTTT<br>CTCCATAATCTGTTACCCTTCAATTCAAATTAATTGT<br>TATATACTAACTACCAGCTAGTGCTAGTTCTCTCAA<br>TTTATGACACTTCTA      | TAAAAATGACATTGATGATCCAATGACAATCATAAGCT<br>GCAATACAATTATAATCAATACTAATCCAATTAATGAT<br>ACTTATTAGTCAAAAAaTAGAAAATTGTAIAAAAAAaT<br>CTCACCTGATTTGTTGTTGCAAGTCTCCTCTAaGATTTT<br>TTGGTGCTATTTCTGCTATATATACTGGAACCTGATCCA<br>TTTTGCT  | 36.7                   |

| SNP IDs | Desi chromosomes      | Physical positions (bp) | SNPs/SSRs | Upstream 200-bp flanking sequences/Forward primers (5'-3')                                                                                                                                                                     | Downstream 200-bp flanking sequences/Reverse primers (5'-3')                                                                                                                                                                 | Genetic positions (cM) |
|---------|-----------------------|-------------------------|-----------|--------------------------------------------------------------------------------------------------------------------------------------------------------------------------------------------------------------------------------|------------------------------------------------------------------------------------------------------------------------------------------------------------------------------------------------------------------------------|------------------------|
| CaSNP38 | <i>Ca-desi</i> -chr01 | 3963327                 | (T/C)     | TAAAGAAGTTTGATTCTAAAAAACTGTATAGATTTA<br>CTATGCAATTTTCTGTGATGCTATTAATTGTTTTTAC<br>GTCTTGTTTTATGTGCAACACTTGATGCCAGTGATGA<br>TCAAAATCATTTGATAACTTCATGCAGCATAAAACGT<br>TAGCTACTTAACCAAGATGGGATCTATGTTGTTAAT<br>TTTGATAGTAGCGC      | GAACAGCAGACTCTAAATCTGGGATAGCAGTTTAGCG<br>GAAAGCGGGAAAGCAGCTATTCTAATATAATTTTATT<br>GAAAATCCATTCTCTAAACCCAAAAAaTTGAAACTTCAT<br>CTTCTCCAAAAGGCATGCAGTCTTTCTCAACATATGAA<br>GGTGGCGGCAGAAAACAGCAGACTGTGGCCGAAAAGT<br>TTTCTTCTAA   | 37.8                   |
| CaSNP39 | <i>Ca-desi</i> -chr01 | 3995579                 | (C/T)     | GATCTTTGACTTTCTATATTCATGACAGGTATATGTAA<br>CATGGTTTAATTTTGCAAGGAGTTACCAAGTTTGATCC<br>TTCTACCGGAAAACAGTTCAAGGCCAAGGCTCCCACC<br>CAGTCATACACAACATACTTTGCTGAGGCTTTGATTG<br>CAGAAGCAGAAGCTGACAAAAACATTGTTGGAATCC<br>ATGCTGCAATGGGAGG | GGAAGTGGCATGAATCTCTTCTCCGCCGTTTCCCTGCA<br>AGATGCTTTGACgTGGGGATAGCAGAACAGCATGCTGT<br>TACATTTGCTGCAGGTCTGGCTTGGAAGGGCTTAAGC<br>CTTTTTGCGCAATTTACTCATCCTTCATGCAAAGAGCTT<br>ATGACCAGGTAAGATCTGATAACAACCTCCCAAGTAC<br>ATATATCCT   | 39.4                   |
| CaSNP40 | <i>Ca-desi</i> -chr01 | 3996356                 | (C/T)     | TAACTTTAGTAAGTAATGCTTTAAGTATATATTTTCATG<br>TCTATTCGAAGGTGGTGCATGATGTGGACTTGCAAAA<br>GCTGCCTGTTAGATTTGCAATGGACAGAGCTGGATT<br>AGTTGGAGCAGATGGTCCAACACACTCGGGTTCTTTC<br>GATGTCACATTTATGGCATGTCTCCCTAACATGGTGG<br>TGATGGCTCCTTCTGA | GAAGTGGAGCTTTTCCACATGGTTGCTACTGCAGCTGC<br>CATTAAATGATCGACCTAGTTGTTTTCGATATCCAAGGG<br>GAAATGGAATTGGTGTGCaCTACCAAAAAGGGAATAA<br>AGGCACTCCTTTGAGGTGAGTTAGATTTATTATGGCC<br>ATCTTTATACTTCACAATTATTTCTTATGAGGATGATTA<br>GGAAGAAGTG | 40.7                   |
| CaSNP41 | <i>Ca-desi</i> -chr01 | 3996916                 | (C/T)     | TGTATTGGTAATATTTCTCTTGAAAACAGTTTCGGCA<br>AACAAGATTAACATTTGATTTTCGACATCTAACAGA<br>TTGGAAAAGGTAGGATTTGATTGAAGGGGAAAAGA<br>GTGGCCCTTTGGGCTATGGATCAGCTGTTCAAGACT<br>GTCTAGCTGCAGCTTCTTGTGGAGCATCACGGCTT<br>ACATGTAACAGTGGCCGA      | GCACGTTTCTGCaGCCATTGGATCGTTCCCTCATCCGC<br>AGCCTAGCCAAATCACATGAGGTTTTAATCACTGTGGA<br>AGAAGGATCAATAGGAGGATTTGGGTCTCATGTGGTTC<br>AGTTCATGGCCCTTGATGGTCTTCTTATGGAACCTTAA<br>AGGTATATATGACCTTAAATATTTGCATGTCTTATAATA<br>CTCCACCC  | 41.8                   |
| CaSNP42 | <i>Ca-desi</i> -chr01 | 5004855                 | (A/C)     | AAACACATTTACAGAATAGATGTAGTCACTACCTTAC<br>CTCATTCTCTAGTTCTAACCTTCTCATCTCTCAACTAG<br>TATTATACATTATATGATAATGCAATAATGTTAATA<br>AGATTTGTGTAATATTGTGATTAATTCACACCACGGC<br>GACAGTAACATAACACCTGTAATAGCTGAAGCTGCA<br>AAGTTGTTCTATGTA    | AGTATCTAAATTTAGTAAATTAATAATGTGGAGAGAA<br>TATAATGTATTCTACACTATAATCTCACAGTGCATA<br>GAATTAACCAGTGTGTGATGGTGGAAAAATTACCTGCA<br>GCTCCAGATTCTAAATTATCACCCTGGCAGCATTCTTT<br>TTtCTCCTTGACCTACACACCCAATAAAATTAGCCACAC<br>AAAAAAT      | 42.5                   |



| SNP IDs | Desi chromosomes      | Physical positions (bp) | SNPs/SSRs | Upstream 200-bp flanking sequences/Forward primers (5'-3')                                                                                                                                                                   | Downstream 200-bp flanking sequences/Reverse primers (5'-3')                                                                                                                                                                | Genetic positions (cM) |
|---------|-----------------------|-------------------------|-----------|------------------------------------------------------------------------------------------------------------------------------------------------------------------------------------------------------------------------------|-----------------------------------------------------------------------------------------------------------------------------------------------------------------------------------------------------------------------------|------------------------|
| CaSNP43 | <i>Ca-desi</i> -chr01 | 5004917                 | (C/A)     | CATCTCTCAACTAGTATTATACATTATATGATAATGCA<br>AATAATGTTAATAAGATTTGTGTAATATTGTGATTAA<br>TTCACACCACGGCGACAGTAACATAACACCTGTAATA<br>GCTGAAGCTGCAAAGTTGTTCTATGTAAAGTATCTAA<br>ATTTAGTAAATTAATAATGTGGAGAGAATATAATGT<br>ATTCTACACTATAAT | TCACAGTGCCTATAGAATTAACCAGTGTGTGATGGTG<br>GAAAAATTACCTGCAGCTCCAGATTCTAAATTACACCA<br>CTGGCAGCATTCTTTTTtCTCCTTGACCTACACACCCAAT<br>AAAATTAGCCACACAAAACAATTAATACATCATAGAG<br>CAAAATCACCACAGCATTTAACTGCATCTATGATCAAA<br>GTCATACA  | 43.6                   |
| CaSNP44 | <i>Ca-desi</i> -chr01 | 5022262                 | (G/T)     | GCATCTGATAAAAATTGGAACGATATAGGATATAAAG<br>TATGTTATGTTAGTAGCTAAAATTTATCTATTAAGA<br>AGTGTTCTTTAATAAATGTGTTTTAAGTTGTTGGGT<br>AAGATCATAACTACCATACCCATTTCTAATAATTGCT<br>GTGGTCACTCAGTGCCAGCAAGCAACAACAACTTA<br>ATAAGCAGCTGCAAAT    | GTGACACCCCTCAATCATGATACTAGTATAAATACTATG<br>CCTTATATATGGTGAATGATTATGTTCCAATATCAAAGT<br>ATCAATTAAGTAGGGTTATAGAGATTAATGGTCCCAC<br>GGTACCAGTTATTTCTTAACAACACAAACTTGAGGCT<br>AGTATCCAAACAGACCCTACTCTACACAGAGTATACAT<br>GCTAGAAA  | 44.8                   |
| CaSNP45 | <i>Ca-desi</i> -chr01 | 5039614                 | (C/A)     | AATTATATTTTTAGTGAGGTTGAATTTGTAGAATGAA<br>TATCATTTTTCTTTGTAGAAAAAGTATTAGCAAAAA<br>ATAGGGGTACGAATAGCAGCGTGAAAATATATTCGA<br>TGGTGTGGGGTATTAAGTTTGAAGCCAAGCGAGA<br>AGTGAAAAAAGGAGGCCAAAGGAGAAATGAAACA<br>GAGAGAGAAAAGTGACAGACA   | CAGCAGAAACAAAGAGTTAGTGTGTTGTTGAGGTTGT<br>AGTGAGATTAGTGTACAGCAGCAACGATCCATAGAG<br>AAGATTGAAAAGATGAACACAGATAtCACTGCTCCAC<br>TAAACCAGAGTACCCCGTCGTTGATCGCAACCCTCCTTT<br>CTCTACTGTCGTCGGCAACTTCAATACCCTCGATAACCT<br>CCGTTTCGTC  | 46.9                   |
| CaSNP46 | <i>Ca-desi</i> -chr01 | 5061066                 | (T/A)     | ATTGATTAACAACTGTCTTACTTACAACTCTAGAT<br>CCTTTTGTAACCTCTCTTACAGGTTCCGTGGAAGAA<br>aGAAAAaGATACTAGTTGGCTACCACCAATAGCTT<br>GCCAAATGCAGAACTTGAAGTGTATGGCTAACCT<br>AATAATGAAAATTGTGCAGCATAGAAGGAACATTAT<br>TCCAAGGAGCTGAATA         | TGTACATACTAGGACAGCACAACGTCTTGTTCCATGTG<br>CTTCAGTGTCTGTTGCAAACAACCTCAGCAGCTTTCCTT<br>GCAAACGGGAACATGTTTGAATCCCTAAAGAAATTGTG<br>TATAACTCATCAAGAACATCGCAAATTGTCTCAACCAAA<br>ACTTTAATCAGCAGAAATTTATCCCTTGTCTTCTGCG<br>GCGTAAGT | 47.8                   |
| CaSNP47 | <i>Ca-desi</i> -chr01 | 5061125                 | (G/C)     | AGGTTCCGTGGAAGAAaGAAAAaGATACTAGTTGG<br>CTACCACCAATAGCTTGCCAAATGCAGAACTTGGAA<br>AGTGTATGGCTAACCTAATAATGAAAATTGTGCAGC<br>ATAGAAGGAACATTATCCCAAGGAGCTGAATAATG<br>TACATACTAGGACAGCACAACGTCTTGTTCATGTGC<br>TTCAGTGTCTGTTGCAAA     | AACTCAGCAGCTTTCCTTGCAAACGGGAACATGTTTGA<br>ATCCCTAAAGAAATTGTGTATAACTCATCAAGAATC<br>GCAAATTGTCTCAACCAAACTTTAATCAGCAGAAATTT<br>ATATCCCTGTTTTCTGCGGCGTAAGTTACGCATTTATC<br>AGTTTCTACTTAAGTCAGGAATATAGCCTGCATCCTTA<br>ATATAGAG    | 48.9                   |

| SNP IDs | Desi chromosomes      | Physical positions (bp) | SNPs/SSRs | Upstream 200-bp flanking sequences/Forward primers (5'-3')                                                                                                                                                                  | Downstream 200-bp flanking sequences/Reverse primers (5'-3')                                                                                                                                                                   | Genetic positions (cM) |
|---------|-----------------------|-------------------------|-----------|-----------------------------------------------------------------------------------------------------------------------------------------------------------------------------------------------------------------------------|--------------------------------------------------------------------------------------------------------------------------------------------------------------------------------------------------------------------------------|------------------------|
| CaSNP48 | <i>Ca-desi</i> -chr01 | 5498890                 | (A/G)     | ACAACCTGATGGAAATTAGCTGAAAACACTTATGAA<br>CAAGTCGTAAGAAGTTTCCATAAAATCTTCAAACAG<br>GATAACAAGTGCTTAGGCCAATAGATAATCATAAGC<br>CAATCCAAACAGACCCATATTTGGACGAATGAATGC<br>TGCGAAAACTGTGTAAAGCTATTTGAGTATTTCAACT<br>TTGAATGAGAAATAATGG | GGGAAAGAACAAAGTGAAACTAGAAAGGAAAAGGAAG<br>AAATTAGTTGCTGCGAGTTTCAACCATTGTGTTGTGTCT<br>TATTGTCTACTTTTTCAATTAGTAAAGGAATCACTTACT<br>GTAATGAATCCTGGAATTTGTTGAATCGTATAATATTGT<br>GCTAGTGAGAGTGTGCATTTCTGGATGAATGTACCATT<br>TTCAATTTTG | 50.5                   |
| CaSNP49 | <i>Ca-desi</i> -chr01 | 5511162                 | (T/G)     | TATAAAGGATAAACAAGAAAAaTTAACAGAAATTAC<br>TGTGTTTTTCAATTGATTTTGAAGATTTTACTAC<br>ATTTTCTGAAGCCAaaCTAGCTGCTTATTTGACTTCA<br>CCACCTGCTTGTAGCTGGTAGAAGTGCTGTATTTT<br>ATAACCGCTTGTTTCAACTGTGCATTTCTAGTTGCTT<br>GTTTTGACTTACA        | TTTTTAGTTTGCATATATCTTAAAGTTCTCCGTGCTGCATC<br>TGTTCTTATATATGTGATTTTCTTTCTGACCGCTATTGG<br>CTTAATTATTAGTCACTTTCTACCCCTATTTAAACCCTAG<br>AGGCAAATTTCTGAAGCTCTCAATTCTTGTGTTTCTTA<br>ATCTCTAATTAAGTTCTCATATTGGTGTATTGATTTTGT<br>T     | 51.8                   |
| CaSNP50 | <i>Ca-desi</i> -chr01 | 5537208                 | (C/T)     | AGCAGAGTTAGAACAAGTGAAGAAAGAACAAGAGG<br>AACTAAAGGAGAAAAGAACAAGCAGCAGAAGCTCTA<br>GCTGTTAACCTCACGGATGAACACAAAGTAGCAAA<br>AAAAaTGAAGATTCTTGTATAACAAGAATCAAATG<br>AGAGTTATTGTCAAGACATAGACTTGAAAATCAAGC<br>AGCTATCGTTGAGAAAAGAAAA | GCGAAAAAaGAAGAAGAAGAGATGAGAATAAAAGCTC<br>AGGAACTGAAACAAGAAGCTGACAAATCAAGAGTTTT<br>GTCTGAAGAAATAGAAGGGAACTAGAGCTTTTACTG<br>AAACAAGCTGAAGAAGCAAAAGCAGCTGAAAAAaGGG<br>CTGTTGAGGAGATGAAGTTGTTGTCTGATAACACACAA<br>GGTAGAGTCTCAGTT   | 52.6                   |
| CaSSR5  | <i>Ca-desi</i> -chr01 |                         | (GA11)    | GTTGAGCAACAAAGCCACAA                                                                                                                                                                                                        | TTCTTGCTGGTTGTGTGAGC                                                                                                                                                                                                           | 53.8                   |
| CaSNP51 | <i>Ca-desi</i> -chr01 | 5537508                 | (C/T)     | AGAGCTTTTACTGAAACAAGCTGAAGAAGCAAAAGC<br>AGCTGAAAAAaGGGCTGTTGAGGAGATGAAGTTGTT<br>GTCTGATAACACACAAGGTAGAGTCTCAGTTTCAGAT<br>CCAAGTGTAAGATCATATTGACAGTTGATGAATTTG<br>CTGACTAAGTGGTAAAATCAAGGAATCTGAGGATT<br>TGATTGAGAGGACGGAAAC | GCTGCAATGGCTCAAGTGAAGCAATCAACACAAGAA<br>GAATTGAAGTGGAGAAAAAAGTGAAGCTAATCTTAA<br>AGCAATCGAAGAAaTAAAGGCGGCAACAGATATGGCT<br>TTGAGGAATGCAGAGATGGCAGATTCGGCGAAAGTAG<br>CAGTTGAAGGCGAATTAAGAGGCGGCGCAAGAAGA<br>ACAAAAAGGTGTATCT      | 55.4                   |
| CaSNP52 | <i>Ca-desi</i> -chr01 | 5568121                 | (A/C)     | GGCAATAAAAAGACATCCTGGATTTTACGTATGCAA<br>AGGGTTCCATACCTGTTAGATGAAATTTGAGATATCA<br>ACATATGAATCAACTAAAAGAAAGTAATTACATAATT<br>GTGGACTGAATCTTAAAAAATGTTTTtGTTAATCA<br>GAATTTAAGAGGATGCTGCCATGAACAAATATATGA<br>TTTTGGTGATTCGTAT   | AACCTATTTTGTAGTGAAAAATTGAAAAAaCTATCTATT<br>CACCTACAGCATGCTGCTTACTAAGTTAATCACTTTAAG<br>AAAACCTATTTTCTCGGGTTCAATTAAGTGCAGAAAA<br>TCTGCTTAAATGCATTATTAATTAATATTCTGAAAAC<br>AGGTGATTTGTTCACTATAACATTTTAGAGAAGCTTTAA<br>AACTTC      | 56.7                   |

| SNP IDs | Desi chromosomes      | Physical positions (bp) | SNPs/SSRs | Upstream 200-bp flanking sequences/Forward primers (5'-3')                                                                                                                                                                       | Downstream 200-bp flanking sequences/Reverse primers (5'-3')                                                                                                                                                                    | Genetic positions (cM) |
|---------|-----------------------|-------------------------|-----------|----------------------------------------------------------------------------------------------------------------------------------------------------------------------------------------------------------------------------------|---------------------------------------------------------------------------------------------------------------------------------------------------------------------------------------------------------------------------------|------------------------|
| CaSNP53 | <i>Ca-desi</i> -chr01 | 5613829                 | (C/A)     | TGCACAAAATCTCAGTATATTA AAAAGTGAGCAATT<br>TTTTAAAGAGTAAAATAGTACTAAATTTTAATTGTTG<br>ATGAAAAAaTTAATGGTTCATACATACTGTAACACAT<br>TTATATCTTGTTATGTATCTGCATATAATATCAAAGTT<br>GATTTATGTAGCAGCAATAATTGAGATTACTTATTTT<br>ACCTTTAAAGTGAAT    | AGTGAATTCTATTA ACTGTAAAAGGTTCACTTTTAATCA<br>AACATCACAAAAGAAGTTACACTGTGCGGCACAGCTGCAA<br>GTGCAGGGTTTATTGTAGCATATGTATCATAAAGACAT<br>TGATATAAGCATTGCATTTTCCCTTTATCAGTTTCAGGG<br>TTTACCAAACAATATTTATAACGCGACCTTATATTTAC<br>CACACATG | 58.4                   |
| CaSNP54 | <i>Ca-desi</i> -chr01 | 5644131                 | (G/C)     | GTGTTTTTGCACACTCATTGTTATCATTAAATTTATAATAC<br>AACTCAAGATTTGATTAAGCTCAAAGTAACTGTTATA<br>TCATTTTTCTGTGAAGGCTGTCGCTGCTGCACGTTTCA<br>ATGGAGGCCGATGATAAGATGTGGCAAAGTATGTTG<br>TGAGGAAGGATGTTGCTAACTTAAGCATTACAAGGT<br>TGAAGAAGACCCCTTA | AAGTTCTATATATGTTTCTCTTCCAAAAGAAACATAAAAA<br>TACTATGCTGCTAAATAATAATTATGCAGGAAGCCTGA<br>TAAATAGGTTCTTTTGCATAAAAAGTTTGTAGTGTATTG<br>ATAACTTGGTATAATTGTACTTTTAAATGATATGTCCA<br>TTCCCAAGAGAGATTTCAACACAAAAACCCTTGAAGA<br>CTATGAAG    | 59.5                   |
| CaSNP55 | <i>Ca-desi</i> -chr01 | 5676601                 | (T/C)     | AAAATGACCTAATTGTTCTGGTCCAATGTATATTATT<br>TATTAATAATCATAGAAAGTCAAATTTAAGAAAC<br>CTGGGAaTAGTTTTGGATAGCTCTGTTGAAACCACTG<br>TGATAAGATTGTACAACCTTCAACCAACTTCTCGAT<br>AAGATCACTTTGCTCCTTCAAAAATTGGGCAGCCCCA<br>TCACGGTCTTTTGA          | GTCAAAATATGAACAACATGAGGTAACGAATCAAAC<br>GAGCAGCAATCCAAATCTCATCTATCCTAGAGATTTCTT<br>CTCTCAGATACTGCATTCAAATGTAGAACAAAGACTCA<br>AATTATCACGAATAACTAAACGAGTATTCAGTGCAACG<br>CATGAAAAAGTACAATATAAATGCAATTCCGTCCATCCT<br>ATAAGTTTGC    | 60.2                   |
| CaSNP56 | <i>Ca-desi</i> -chr01 | 5753424                 | (G/A)     | GGAACCTGACATACATAATCACAAAACGTTCAATAAA<br>ATATTTGAGAAATAGTAATGAATTTTTTtCtAGAACA<br>TGTGTTTTTtAGTACTTACAATCCCTAACTTTTGTA<br>GATTGTTGATGTTTTTAGGCAAAGGTCCACCTAAAAA<br>aTTGTGATCCAAGCGCTGCAGCCGCAGAATTATACT<br>TCAAGACCAAAGC         | AAACAAGAAATTTGTATTATCAATTTATATGAGTTTTGG<br>ACACTCACACTACTTCAAGGTGCTGGACAAGTCCAAGT<br>GTTGATGGAATGCTGCCAGTAAATTGGTTACTTTCAA<br>AAGCTGCAAAAAaGTAAaTGAAATTCATGATGAAAA<br>AAaTTCTACTCAAATTTGTTTAAATGTAACAAATTC<br>TGATGAAA          | 61.3                   |
| CaSNP57 | <i>Ca-desi</i> -chr01 | 5753484                 | (T/G)     | TTTTTTtCtAGAACATGTGTTTTTTtAGTACTTACAATTC<br>CCTAACTTTTGTAAGATTGTTGATGTTTTTAGGCAAA<br>GGTCCACCTAAAAAaTTGTGATCCAAGCGCTGCAGC<br>CGCAGAATTATACTTCAAGACCAAAGCGAAACAAGA<br>AATTTGTATTATCAATTTATATGAGTTTTGGACTCA<br>CACTACTTCAAGG       | GCTGGACAAGTCCAAGTGTGATGGAATGCTGCCAGTA<br>AATTGGTTACTTTCAAAAAGGCTGCAAAAAaGTAAaTG<br>TAAATTCATGATGAAAAAAaTTCTACTCAAATTTGTTTA<br>ATAATGTAACAAATTCCTGATGAAAAAAaTTGGAATG<br>AATCTTACACATGTATCAAAGACATTTGAGAGCTAAAA<br>AGTTGAGGTG     | 62.5                   |
| CaSNP58 | <i>Ca-desi</i> -chr01 | 5776369                 | (T/C)     | ACTAATTGTGTAAGTTTGATTTTTGATGAAAATGGG<br>TCTTTTTATTTGTTATCTTAATTTGATTTATGTTTGTGG<br>GTTTATGCAGCTGGGAACTTCAAAGCATAACAAT<br>GTTTCTGGAGGGGGACCTCAGGTATGCAAGATGGA<br>AAGGGTGATGGTGTCTGCTGCAATCAAGGATCTG<br>GTTGGTGTTATTATGA           | GCTGGTGATGCcATCAAGTTTAAATTTtCCTGCTGCTTTTt<br>CCATCACCATGTTGAGTTGGAGTGTCAATTGAGTATAGT<br>GGTAAGTATGAAGCTACAGGGGAGCTTGATCATGTCA<br>AGGATATTATAAATGGGGTACTGATTATTTTCTCAAGA<br>CATTCAATAGTACAGCTGATACCATTACCACCATTGCTG<br>CACAGGTA  | 63.8                   |

| SNP IDs | Desi chromosomes      | Physical positions (bp) | SNPs/SSRs | Upstream 200-bp flanking sequences/Forward primers (5'-3')                                                                                                                                                                     | Downstream 200-bp flanking sequences/Reverse primers (5'-3')                                                                                                                                                                  | Genetic positions (cM) |
|---------|-----------------------|-------------------------|-----------|--------------------------------------------------------------------------------------------------------------------------------------------------------------------------------------------------------------------------------|-------------------------------------------------------------------------------------------------------------------------------------------------------------------------------------------------------------------------------|------------------------|
| CaSNP59 | <i>Ca-desi</i> -chr01 | 5807642                 | (G/A)     | TGAGCACAGCTGAAGCAGCATGAACCTCTACACGAA<br>GGTTCTGAAAATCATCCATCGCAGCAGCTAGGGCTG<br>GCAACAAACACCTCCTGATGATATTGAACTTGCAAAT<br>CTGGACCCAAATCACTAGACAGTTGCCAATTGCATT<br>AATAGCTGCCACTTTACACGAGGATGTTGATCAGG<br>AAATGAATTCAATACCATA    | CCACCCTTGCTCCAAATTTATATCATGACCTTTGAGC<br>ATCCTTCAGCTATCTGAGCACGTGCAATCAGTGACGCA<br>TGACGTTTTTCCACTCAGGTGCAGCCAAATATGCAGG<br>TAATTGTTCAGAAGCAACAGGCACAATCGTATTTCTCC<br>AAAGATATAGATAACCTGTCTAAACATTCTGTCCAACA<br>CTATAATT      | 64.7                   |
| CaSNP60 | <i>Ca-desi</i> -chr01 | 5823260                 | (C/T)     | CTTCAACATTCAAACAGTAAGTACTAGTAAGAAGTAACT<br>GGTGATCCAAAAGAATGAGCATGTTCAATGAAGCCC<br>TTAACACCAATCCAGCTATCCCAGCTTCCTTGACCAG<br>CCCTTTTGTCTCATGATGCTTCTCAGTTCATCAACAC<br>AATCCCACCTACCAATGGCTGCATAAAAAGTTTGATAC<br>AAGCACAATATTGCT | GCTTTGTGCGGGTCCAACTGCAAGAGATGCTTTGCAGC<br>AAATTCACCTCTTTCAAATCTTGATTAAGACTGCAAGC<br>ATTCAACAATGCTATCCATACTCTGCAGTAGGTCTACT<br>ACCCATTTCAATCATATTGTGATAAGTGGACCAAACATC<br>TTCTATATTACGGCTCGACCTAAGATATCTATGAAGCA<br>CGCGTAG    | 65.9                   |
| CaSNP61 | <i>Ca-desi</i> -chr01 | 6080870                 | (T/C)     | GAGGTGCAGATCTGACCATTGCAAATTACGCAATCT<br>ATGCAAGAAGAAACAACCAGAGGATTGAATGGTAAT<br>TTTCTTAAGCTGCAATTCCAATTGTTAACATGCTCGT<br>TTGTATGAATCAAACCTTTGTGATGTTGCTGAATAGTA<br>TCCCTtACTTGTGCTAGAGTTTTGTATCAATAGCCTTG<br>CCCCAAAATTTGCAA   | AAGTGCAAATATCCACTTTGCTCTGGATTTGAAGCTTT<br>ATGCTGCCAAACAAAAGGAATGGGCCTCTAGAGAGGG<br>AGTTTAACTAGGTGTCTTCAGAGCAATGTTTGTGGTA<br>CGATTTTTCTACCATTTCTGTGTTGATTCTTGAGGCACAA<br>TAGTAACGCATGTGATATCTGTAGTCTTTCAACAGCATA<br>AGAAAAGAC  | 66.7                   |
| CaSNP62 | <i>Ca-desi</i> -chr01 | 6083987                 | (T/G)     | AAAGACTTGCATTGCACTGGAGAGATAAGTATATCTC<br>CCGGAGAAACCTGCATTTTATATAGATTCTCACTTTTC<br>TTTTGGACAGAAACATCAGCACAAGCACAATATCAC<br>ACACAaTATTGTACCTCCTCCACGTGCTTGAAGCCA<br>GTGGATCCACAGAACTTCTCTATCTGTATACTGAGA<br>AGATGTTGCAGCACT     | GTTTTGTCTATGAGAGACAATTGAAGTATTCTTTCAACA<br>CGATCTGGCTTCTCATCCAACCGTATAGCAGCCATATCC<br>GATAGAAGCTTTAGGGACTGTTTACACGGCAAAAAGATA<br>TTTTACATGGTGATTAATAAAGTGTGCTTCCAATATAA<br>TTTCTTCAAGTATGAGCAAGTTGAAAGATTATCATTGAA<br>CTAAGTA | 67.8                   |
| CaSSR6  | <i>Ca-desi</i> -chr01 |                         | (TA30)    | TCATTAATAATTCTATTGTCTGCTCCTT                                                                                                                                                                                                   | ATCGTTTTTCTAAACTAAATTGTGCAT                                                                                                                                                                                                   | 69.5                   |
| CaSNP63 | <i>Ca-desi</i> -chr01 | 6108008                 | (T/G)     | CTCAGGTACATGTATCCTTCTCACTCTCTCATTAAAT<br>TGATTTATTCACACTTTCCCTAGGTTATCAATATAGG<br>CAATTAGCGCCGCAATCATGCCAGTGCGGCATGGAA<br>TAGAGGCTTGGGTGTTGCACCGGAGTTTGCAGCAGC<br>GTGGTGCAAGTATTTTCATGTCTGGAGTGGCACAACA<br>GACCCACTGCAGCGTA    | GGTTTCGCAAAAaCGTAACTTTCACTTTCCTTGTCTATT<br>ATGTGCAAACCAAAGCTTCTCTTTCTTCAAACCTTGCA<br>TTCTTGCAGTAGAACAAGAACAACGACCTAGCTGCCT<br>CCGTTGCAGGCGCCATCGACCCACCGTCGCATCTATC<br>CTCTCCGAGCAGCTCTCTTTCTGTGCGACCTTGATGTA<br>TTTCTGC      | 70.4                   |

| SNP IDs | Desi chromosomes      | Physical positions (bp) | SNPs/SSRs | Upstream 200-bp flanking sequences/Forward primers (5'-3')                                                                                                                                                                     | Downstream 200-bp flanking sequences/Reverse primers (5'-3')                                                                                                                                                                | Genetic positions (cM) |
|---------|-----------------------|-------------------------|-----------|--------------------------------------------------------------------------------------------------------------------------------------------------------------------------------------------------------------------------------|-----------------------------------------------------------------------------------------------------------------------------------------------------------------------------------------------------------------------------|------------------------|
| CaSNP64 | <i>Ca-desi</i> -chr01 | 6108016                 | (C/T)     | CATGTATCCTTCTCACTCTCTCATTAAATTGATTTATT<br>CACACTTTCCCCTAGGTTATCAATATAGGCAATTAGC<br>GCCGCAATCATGCCAGTGCAGCATGGAATAGAGGCT<br>TGGGTGTTGCACCGGAGTTTGCAGCAGCGTGGTGCA<br>GTTATTTTCATGTCTGGAGTGGCACAACAGACCCACT<br>GCAGCGTATGGTTTCG   | AAAAAaCGTAACTTTCACCTTTCCTTGCTATTATGTGCA<br>AACCAAAGCTTCTCTTTCCTTCAAAACTTGCATTCTTGC<br>GAGTAGAACAAGAACAACGACCTAGCTGCCTCCGTTGC<br>AGGCGCCATCGACCCACCGTCGCATCTATCCTCTCCGA<br>GCAGCTCTCTTCTGTGCGACCTGTATGTATTTCTGCCT<br>GGTTTT  | 72.5                   |
| CaSNP65 | <i>Ca-desi</i> -chr01 | 6108035                 | (T/A)     | CTCTCATTAAATTGATTTATTCACACTTTCCCCTAGGTT<br>ATCAATATAGGCAATTAGCGCCGCAATCATGCCAGT<br>GCGGCATGGAATAGAGGCTTGGGTGTTGCACCGGA<br>GTTTGCAGCAGCGTGGTGCAGTTATTTTCATGTCTGG<br>AGTGGCACAACAGACCCACTGCAGCGTATGGTTTCG<br>CAAAAAaCGTAACTTTCAC | TTCCTTGCTATTATGTGCAAACCAAAGCTTCTCTTTCCT<br>TCAAAACTTGCATTCTTGCAGTAGAACAAGAACAACG<br>ACCTAGCTGCCTCCGTTGCAGGCACCTCGACCCACC<br>GTCGCATCTATCCTCTCCGAGCAGCTCTCTTCTGTGCG<br>ACCTTGATGTATTTCTGCCTGGTTTTtAAATTTtCCTCTG<br>TTTTG     | 74.3                   |
| CaSNP66 | <i>Ca-desi</i> -chr01 | 6108094                 | (C/T)     | CGCAATCATGCCAGTGCAGCATGGAATAGAGGCTTG<br>GGTGTGACCGGAGTTTGCAGCAGCGTGGTGCAGT<br>TATTTTCATGTCTGGAGTGGCACAACAGACCCACTGC<br>AGCGTATGGTTTCGCAAAAAaCGTAACTTTCACCTTC<br>CTTGCTATTATGTGCAAACCAAAGCTTCTCTTTCCT<br>CAAACTTGCATTCTTG       | GAGTAGAACAAGAACAACGACCTAGCTGCCTCCGTTGC<br>AGGCGCCATCGACCCACCGTCGCATCTATCCTCTCCGA<br>GCAGCTCTCTTCTGTGCGACCTGTATGTATTTCTGCCT<br>GGTTTTtAAATTTtCCTCTGTTTTGTGAGAGTAAAAACAG<br>AAGAGCCACACTAAAGCCTCATTTTTTTtGtACTTTTCCC<br>CGTCC | 75.6                   |
| CaSNP67 | <i>Ca-desi</i> -chr01 | 6108140                 | (A/G)     | CGGAGTTTGCAGCAGCGTGGTGCAGTTATTTTCATGT<br>CTGGAGTGGCACAACAGACCCACTGCAGCGTATGGT<br>TTCGCAAAAAaCGTAACTTTCACCTTCTTGTCTATTA<br>TGTGCAAAACAAAGCTTCTCTTTCCTTCAAACTTGC<br>TTCTTGCAGTAGAACAAGAACAACGACCTAGCTGC<br>CTCCGTTGCAGGCGCC      | TCGACCCACCGTCGCATCTATCCTCTCCGAGCAGCTCT<br>CTTCTGTGCGACCTTGTATGTATTTCTGCCTGGTTTTtA<br>AATTTtCCTCTGTTTTGTGAGAGTAAAAACAGAGCCA<br>CACTAAAGCCTCATTTTTTTtGtACTTTTCCCCGTCCAGC<br>CATGTTAGCTTCATCTCATGGTCCACAAAGTAACAGCAC<br>ATCG   | 76.9                   |
| CaSNP68 | <i>Ca-desi</i> -chr01 | 6111677                 | (A/G)     | AGAAGAAGCAGAGCGACTCTAACGAAACGAAGTTAT<br>GATCGATCAACGGAGTTAGAAAATGTATGGTGACTT<br>CCTAGATAAGGTCATTGTGCCTAATAGGGCTGCCAG<br>ATCCAACCTGAGAACTAGATAACCAATTTGCCATTGG<br>ACTTCCTGGATAAGACAAAACAGTGCATACGCAGG<br>ATTTCCATATGACTGGAACC   | CCGATTTACCACCCATTGGAACAATGTTGGTGACTTC<br>TGAGGTGAAAGCAGCTATCCAAGATAAGCTTTCTAAAG<br>CTCAAGTAAATTCATGTACGAGTTGCCTAAGTAATTCCT<br>GTCCACGGATGGGTCGTTAAGAGCAACATTTGTGGAT<br>CAGTAGTGCTTCGTGATAGGGAAGAACCAAGTGACGC<br>ATCATAAGAA  | 77.5                   |

| SNP IDs | Desi chromosomes      | Physical positions (bp) | SNPs/SSRs | Upstream 200-bp flanking sequences/Forward primers (5'-3')                                                                                                                                                                       | Downstream 200-bp flanking sequences/Reverse primers (5'-3')                                                                                                                                                                  | Genetic positions (cM) |
|---------|-----------------------|-------------------------|-----------|----------------------------------------------------------------------------------------------------------------------------------------------------------------------------------------------------------------------------------|-------------------------------------------------------------------------------------------------------------------------------------------------------------------------------------------------------------------------------|------------------------|
| CaSNP69 | <i>Ca-desi</i> -chr01 | 6111732                 | (T/G)     | AAAATGTATGGTGACTTCCTAGATAAGGTCATTGTGC<br>CTAATAGGGCTGCCAGATCCAACCTGAGAAGTAGAT<br>AACCAATTTGCCATTGGACTTCCTGGATAAGACAAAC<br>CAGTGCCATACGCAGGATTTCCATATGACTGGAACCA<br>CCGGATTTACCACCCATTGGAACAATGTTTGGTGACT<br>TCTGAGGTGAAAGCAGC    | ATCCAAGATAAGCTTTCTAAAGCTCAAGTAAATTCATGT<br>ACGAGTTGCCTAAGTAATTCCTGTCCACGGATGGGTGC<br>TTAAGAGCAACATTTTGTGGATCAGTAGTGCTTCGTGA<br>TAGGGAAGAACCAAGTGCAGCATCATAAGAATATGAA<br>GCATGGGGCCCAACATTTTGGGCTACAAATGACCCCTG<br>AACATTTGATC | 78.4                   |
| CaSNP70 | <i>Ca-desi</i> -chr01 | 6113445                 | (T/C)     | AGTTTATACAAGCGATTTCACTACATGCCTCTCTCATA<br>TTCTCTCATTCAATATGGTATCTAGAGCTtGGTTTCGAT<br>CCTCCCTGACATGTCTTGTCACTATCCGCTACTGAGT<br>TCCCTAAAGTTGAGAAATATAATAGTAGTTTTTCTTTT<br>CCGGCTACTATCATTCCAGCCACCATTGCTGCTACCC<br>TCTGCTCCAC      | GGAAAATATTTCCGGTGTACTCACTTCCATTGCATGCAA<br>AATCTCTCGACCTACGCAGCCCATAGATTTTACACCTA<br>GAAGTAGCTCCATGCGCCGTCCACCGCCACCATGTTCA<br>TCCCACATCTTTTGGAGATAAAGAGGCGGACATTTGGA<br>GAAAGGCATCTGTAACCTCAGTGAGAGGTGGAGTATC<br>CCAAGAAAAG  | 79.6                   |
| CaSNP71 | <i>Ca-desi</i> -chr01 | 6262893                 | (T/A)     | TATGTTTGTAAATGAAATAGGAGGATTTAAAACCTCAT<br>TAAACCTGTGAAAGCAAATCAGCAGCTACGTGAGAC<br>GGAATTGCATGTTTGTCTGCAATGACTAAAACCTTCAG<br>ATGGACCAGCTGGCATGTCAATTGAAACCATAGCTTC<br>ACTATTCTGCAAAAGATTTTGA AAAAGACAAGAAAA<br>AGAGAAAGAAGTTTTTAG | TTCAAATTATGAAATGCGATAGTGATGTGGATACAAA<br>TCAAGAGATTCAAATATAAACACACTTGAAGTATCATT<br>TTGCAGCTGTAACGTATTGATTTCCAGGGCCAAAAATC<br>TTCTCAACCTGCAAAAGTTGCCACAAATTCACAATTAG<br>AAATGATAGAAAAATATGAATTATGAATACTGTTAT<br>AATTAAGA       | 80.5                   |
| CaSNP72 | <i>Ca-desi</i> -chr01 | 6262953                 | (A/C)     | AGCTACGTGAGACGGAATTGCATGTTTGTCTGCAAT<br>GACTAAAACCTCAGATGGACCAGCTGGCATGTCAATT<br>GAAACCATAGCTTCACTATTCTGCAAAAGATTTTGAA<br>AAAGACAAGAAAAAGAGAAAAGTTTTTAGTTTCA<br>AATTATGAAATGCGATAGTGATGTGGATACAAATC<br>AAGAGATTCAAATATAAAC       | CACTTGAAGTATCATTTTTGCAGCTGTAACTATTGATT<br>TCCAGGGCCAAAAATCTTCTCAACCTGCAAAAGTTGCC<br>CACAAATTCACAATTAGAAATGATAGAAAAATATATGA<br>ATTATGAATACTGTTATAATTAAGAATCAAATCCTAAT<br>ATTTAGGATTAGAATTAGCCTAAGAAGTGCGGACTCCG<br>ACAAGACA    | 81.4                   |
| CaSNP73 | <i>Ca-desi</i> -chr01 | 6304541                 | (A/G)     | GGCTAGAGAAGCTGTTGCTATGAGGTCTAAGGTTCA<br>GAAGGAAATGCTTTtGAAGGAGAAGGAAaGGAaGG<br>AACAGGAGTTGAGGGCTTTGGCTCAGAAAGCACGGT<br>CGGAGAGAATTGGTGTGCTCCACCGGCTGCTGCTG<br>CTTCGGTTGTGAGTGGTGTGATGATGGTGGTGATA<br>TGAGAGTTGATTATGAGCATAG      | GATAGGGAAAGGgATAATAGGGAAAGGGAAAGGGAA<br>AAGAATTTTCCGAAGGAGAGTAGGGAAAGAAAGAGAG<br>GAGCGTTGCAACGTGAGAAGATTCGTGAGGAAAGGC<br>GAAAGGAGAGGGAGAGGGAGAGAAGGTTAGAGGCTA<br>AGGATGCTGCCATGGGAAAGAAGAGCAAGATTACTAG<br>AGATAGGGACCGTGATATA | 82.4                   |
| CaSSR7  | <i>Ca-desi</i> -chr01 |                         | (TS71)    | GGTAGACGCAAAAGAGTGGG                                                                                                                                                                                                             | GCCACATTGACCAGGAATG                                                                                                                                                                                                           | 83.6                   |

| SNP IDs | Desi chromosomes      | Physical positions (bp) | SNPs/SSRs | Upstream 200-bp flanking sequences/Forward primers (5'-3')                                                                                                                                                                     | Downstream 200-bp flanking sequences/Reverse primers (5'-3')                                                                                                                                                                  | Genetic positions (cM) |
|---------|-----------------------|-------------------------|-----------|--------------------------------------------------------------------------------------------------------------------------------------------------------------------------------------------------------------------------------|-------------------------------------------------------------------------------------------------------------------------------------------------------------------------------------------------------------------------------|------------------------|
| CaSNP74 | <i>Ca-desi</i> -chr01 | 6313759                 | (T/A)     | TCTTACAATATGACAACACCAACTGCTACAATTTAATC<br>CTCTGATATACAGATTCCCTGAAGATAATTTAATATTC<br>AACAATCAATTATTAGATTAATAAAATAAAATTTAGGC<br>AGCAGAGCCTATCAGGAAGCATAACGACCTCAATAAA<br>ATAAGAAACCGAACCTAATCAGCCAATGAAGTATA<br>CAATATTTCAACTGTT | TAGGAAAAATTATGCTGCATAGAGATACAAGGGCCTGT<br>TTGATTGAAAATTTTAAACAATAGTTTTCTGTTTTCAAAA<br>GTTAACAAAGAACAAAGATGGTCTATTGTGGACAATGA<br>CTTAAAGTCACCAATATTCTAACACAATCAACGACAAT<br>CCTCATAAAAGTATAAGTTAACCCCATCCCCATCTGTA<br>AAGATGAG  | 84.5                   |
| CaSNP75 | <i>Ca-desi</i> -chr01 | 6319012                 | (A/G)     | ATCATCGAGAAAATGCAGCTACCAATCAACCTATCC<br>GGCGACCTTGATCTAGTCTTGAGAGATTTTCAGCAG<br>TCAATGAATCACCAGACCCTGGTGACCATGAAAAGT<br>GGCTGTGTTTTGATGGAGAGAATCCAGCTACAGCTG<br>CAACTTTTTCATCAGGACTAATATTTCCGATGGCGA<br>CCCTTTACGTGAGGCCAC     | AGTCTCTCGGCTGATAACAACAAAGCACCACCCCTCTC<br>TGTCGAACGAACTGGTCCAGAGATAACTGGCTGCGAG<br>CGTCCACGGATATCCTTACCTGTGCATATTCTGGTGTA<br>GGAGATCTTGACATACGTATGTAGTGTATGAAGACAGC<br>CAGTAAGATTAATATGAAGAGAGCAACCACACATGAC<br>ACTATAATTATT  | 86.9                   |
| CaSNP76 | <i>Ca-desi</i> -chr01 | 6322174                 | (A/G)     | TTAGCAGACCATTTAATAACTACACATAGTAACTAA<br>AACATAAATGCACTGAACTTAACCAACAAAAaGAG<br>TAAACATTATTTTGGAGAGATCTGAAAACTTAAAC<br>ACATTATTTCAAACAAAATCACGTCTTATAAGTACA<br>ATGTAGACTGCAGCAGAAAACCTACCTTACATATC<br>AACTTAAGAACACAAC          | CAAAGATTAACCTTTAAAAaCTCATAGAGTTGAAGAT<br>TTGAAGTACAGAGAAGCAGCATTTTGGCTACAACACT<br>CATGAAGAAAAGGGAAATTAGTACCAATTTGCATCCA<br>TGCTGCAATAAAGAGGAAGGGACCAATAACTTTTTTt<br>GGCCCTAAAAAGCTTTGATGGAAGGAGTGAATTCTTTT<br>TCCAACCCAAA     | 88.9                   |
| CaSNP77 | <i>Ca-desi</i> -chr01 | 6322202                 | (G/T)     | GTAAACTAAACATAAATGCACTGAACTTAACCAAAC<br>AAAAaGAGTAAACATTATTTTTGAGAGATCTGAAAA<br>CTTAAAAACACATTATTTCAAACAAAATCACGTCTTAT<br>AAGTACAATGTAGACTGCAGCAGAAAACCTACCTTC<br>ACATATCAAACCTAAGAACACAACAAAAGATTTAAA<br>ACTTTAAAAaCTCATA     | AGTTGAAGATTTGAAGTACAGAGAAGCAGCATTTTGGC<br>TACAACACTCATGAAGAAAAGGGAAATTAGTACCCAA<br>TTTGCATCCATGCTGCAATAAAGAGGAAGGGACCCAAT<br>AACTTTTTTTtGGCCCTAAAAAGCTTTGATGGAAGGAGT<br>GAATTCTTTTTCCAACCCAAAAAAAaTAGTAACAAAAAT<br>TTCTCTTTTT | 89.5                   |
| CaSNP78 | <i>Ca-desi</i> -chr01 | 6333418                 | (G/A)     | AACCAGACCTTGTTGAGACTGCGGGTTGGCAGCTTA<br>ATTGCAGCAGGGACACCATCATCAACCTCTCCTTTAT<br>ACACCTTACCAAAGCCTCCAACCTCGATGATCAGACT<br>CTCGTCGAAACTATTTGTTGCAGCATTAAATTCGGCC<br>AATGTAAACCGCTTACCAGCTCTGGTTGAAGCCACAG<br>ATCCATATAACTTTTG   | GTTCCAGCCGATCCCTGGCACCTCCACAGTGCTGTTT<br>ACAGCAGCCCCATACAGGAATATCGGTGCGCAACCCGG<br>AGAGTTGTTTTTGGTATCACTTGATTCTTTTCTCCTTTA<br>AAGAAACAGAAAATAAAGACACCAATACATGCCATTAT<br>AGCTACAGAAGCTATACCTGCTCCTACTCCAATCCAAAC<br>AACTCTT    | 90.5                   |

| SNP IDs | Desi chromosomes      | Physical positions (bp) | SNPs/SSRs | Upstream 200-bp flanking sequences/Forward primers (5'-3')                                                                                                                                                                   | Downstream 200-bp flanking sequences/Reverse primers (5'-3')                                                                                                                                                                 | Genetic positions (cM) |
|---------|-----------------------|-------------------------|-----------|------------------------------------------------------------------------------------------------------------------------------------------------------------------------------------------------------------------------------|------------------------------------------------------------------------------------------------------------------------------------------------------------------------------------------------------------------------------|------------------------|
| CaSNP79 | <i>Ca-desi</i> -chr01 | 6341213                 | (A/C)     | ATGCATTTGCTCCTTGTATTGTTCAATTCCTTTGCTG<br>CTGCAACAAGGTTACCCTTAGTAACATCCAACCTTT<br>ACTGTTCTCCACAATCCATTTATGTTGACGATCTGTCT<br>TAGTTCTTAACTGTCAAGCTGTTCCGAGGCAGATTC<br>CATCTTACACTTTTCTGTTCCAAAGCATCAGTTGCCG<br>CTTGGATTATATT    | TCTTTTCTTCCACTATTGATTTCAATTTAAGTATTTAC<br>ATTTAAGTTTATCATTCTCAGCAGCTTTGAATTTTAGTG<br>CTTCATCCGCATCTACCAAAGCTTCTTTAAATATAATTTG<br>ATTAATATCCAGTAGCCCTTGCATCATAATTGACTCCAT<br>ATTTGCTTCTTCTATTTCCAACCCATTGGAAGCTTGAGC<br>ACTG  | 92.4                   |
| CaSNP80 | <i>Ca-desi</i> -chr01 | 6341237                 | (C/T)     | AATTTCTTTGCTGCTGCAACAAGGTTACCCTTAGTA<br>ACATCCAACCTTTACTGTTCTCCACAATCCATTTATG<br>TTGACGATCTGTCTTAGTTCTTAACTGTCAAGCTGTT<br>CCGAGGCAGATTCATCTTACACTTTTCTGTTCCAAA<br>GCATCAGTTGCCGCTTGGATTATATTATCTTTTCTTC<br>CACTATTGATT       | AATTTAAGTATTTACATTTAAGTTTATCATTCTCAGCA<br>GCTTTGAATTTTAGTGCTTCATCCGCATCTACCAAAGCT<br>TCTTTAAATATAATTTGATTAATATCCAGTAGCCCTTGC<br>ATCATAATTGACTCCATATTTGCTTCTTCTATTTCCAACC<br>CATTGGAAGCTTGAGCACTGTGCATAGTTTCTTTCAATA<br>TTATA | 93.5                   |
| CaSNP81 | <i>Ca-desi</i> -chr01 | 8173005                 | (T/C)     | TTCGACTAGATTAGATTAGAGGAAACTGTAAAGAAA<br>AAGTAAAAGTGAATGGAATACCGGATACGATAGAA<br>GGGATTGGAAGGAGTGAAGAGAAGCGCAATGGCG<br>TGTAAGAGTTGGACCCGTTGAGACGGTGTGGGGGA<br>GAGGAACCGAGAAGCGCTGATTCCAAGGTGGCTAG<br>AAGCTGCTTCGGAGAGACATTTG   | GCCGCCGGTGTGATGATGAAATGAAACCCTACGAGTC<br>ACAACACAAGTGAAGAGAGAGAACACAGGTAAGGGC<br>GGGAAGGAGGAAGTGAAGTAAATTTGAGTCCACAAAA<br>ACAAATTTGCAGCTCAAAGTAGTAGCGCCCTGCTGGTG<br>ACGTCTTAAACCCTATCAAACATAAAGTACAAAACCCCT<br>CCACTTGGTTTTT | 94.5                   |
| CaSNP82 | <i>Ca-desi</i> -chr01 | 8871945                 | (C/T)     | AAGGGAGTAGAAAAATGTTGCAGGGTAGTAATGCG<br>GTGGCGGAAGCAAATAGTGATGATGGTGGTGTGAC<br>GAGAGAGGGTATGTACAAAGGAACGGGAGAAGAG<br>ATGGGTATGTCAAGTATGCAGCAAGAGAGGGTCCA<br>ATAAAAGCAGAGGAAGAAGGAGATATGGTGAGAGA<br>TACTGCAAAGGATAGCATGGATGGAG | TTGGATAGCAGCTACAAACAAGGTTGAGATTGTCACA<br>AGGATGAAGGGCAACGATAATTATATAAGGAGGAAAC<br>ATCTTATAAATCCACAATGTTTTATTATCAAAATGTGTC<br>ATCACTTCTTTATGTAATGCCTACTTAATTTCAAACCACT<br>TGCATAATTATGGGTCGTTATGCTTTTCCATTTGCCTATT<br>TACAAC  | 95.6                   |
| CaSNP83 | <i>Ca-desi</i> -chr01 | 10106781                | (G/C)     | TTtATCAAACCTACAAAATAAATAaCCTAAAAAAAa<br>GGATATAACCGTCATTTTCATATAGACGAAACCGAAGT<br>GGTTTCAACCCTAATTATAAATATATAAGACTACCTTC<br>ATTTTTACAGTGTCCACTTGCAGCGCCTCGTGATATC<br>TCTCTGGTGTCAAACCCCTAACATCCAGATCTCGCT<br>ACTCTTCCATTAC   | ATCAAGTAAGTTTGCAGCTTTTTACAATCAATTTCAAT<br>TCCATCTATGTCTCATTGATTCTAACATTTTTGTTTGTCT<br>AATTTTTGAATCAGATATGAAGATCATCGCTGCTTACT<br>TGTTGTCTGTATTGGGAGGTAACCTATCCCCTCAGCCG<br>ATGATGTTAAAAAAaTTCTCCACTCAGGTTGTAATTTT<br>AATTC    | 96.4                   |



| SNP IDs | Desi chromosomes      | Physical positions (bp) | SNPs/SSRs | Upstream 200-bp flanking sequences/Forward primers (5'-3')                                                                                                                                                                     | Downstream 200-bp flanking sequences/Reverse primers (5'-3')                                                                                                                                                                 | Genetic positions (cM) |
|---------|-----------------------|-------------------------|-----------|--------------------------------------------------------------------------------------------------------------------------------------------------------------------------------------------------------------------------------|------------------------------------------------------------------------------------------------------------------------------------------------------------------------------------------------------------------------------|------------------------|
| CaSNP84 | <i>Ca-desi</i> -chr01 | 11569811                | (A/C)     | TCACCGACCATACCGAAGAACTTGGCTTGAGAACAG<br>GCTGGAGGACAACCTTCCAACCTGGGAATGCTTGAA<br>AGGCATGATTCAGCATCCTCAAGTTGATGGAGTTTCA<br>AATAAGCTTCTGCTTTACAAGCCACAAGCTGCAAGTA<br>ACAGTCCAACAAGTAAGACAACACATAACCATTGGAA<br>AATCCAAAATTTTAGTCTC | cTTCATCAATTAAGAAGTACTACCTGAGGTGAGAAGTC<br>TGCTCCAATCGCAACAGCAGCCTCTACTTCTGGATTGC<br>CCTTTTCCAATCACCGATCTTCCGCACATCCGCACATCG<br>GTTACATGCTTCTCCAACAATAACAGCTTCTGCTCTTC<br>CAATTGATCGTTCTGCAAACCCGCATAATATAGGTGGC<br>GACGCGAG  | 97.3                   |
| CaSSR8  | <i>Ca-desi</i> -chr01 |                         | (TR55)    | TTACTCAACCATAATAATAATAATAAT                                                                                                                                                                                                    | CTCTTCAATCTTCACTTATTCAT                                                                                                                                                                                                      | 98.5                   |
| CaSNP85 | <i>Ca-desi</i> -chr01 | 12159674                | (A/C)     | CGTTTATAACTGAGCAACAACAATAGCTTATTGGTAA<br>AAAAaCAATCAACAAAAGAATAATTAAGGGTGGGA<br>TGTGGTGATCATAACACAACAAAAGGTGCAAGTAA<br>TCATAACATAAAACAAACGGGTGCATGTGATAGAAT<br>GCATACAGTTCATTTGCAGCATACAGTTGTGCTTCAT<br>CTTAGGCATGCTGCAATa     | aaGATCAAATTATAATTACTACTATTAGTATTATAAATG<br>CAAGCATATGTGAAAATGAATATGATTGGTTTTCAAAA<br>AAGCGCACCTGTAAAATATGTAAAACAGTGTTCCAAT<br>GTAAACTTTGCAAAAATAACCTTGCTGCACCACACAaGA<br>ATTAGCCACATAAAAaGCAGAAAATAAGGACatAGaa<br>ataTAAAGCT | 99.6                   |
| CaSNP86 | <i>Ca-desi</i> -chr01 | 12163294                | (C/A)     | AAAGGCTTGATGTAGGTTGCTGAACCCCTCCAGTTG<br>GCATGCTATTTATTGTTGAGTTTCTTGATGTAAGTGTA<br>CTGGGCATGTTGGGAACGTTGAAGCTTCCATGCATG<br>TTGTGCAACCCCTGAATACCACCTGTAGcAAAGAGCT<br>AGCTATTATGCAACTAAAGGAGAGAAGAAAATGAAT<br>TGACTCCAGCAAAAATATT | TCACCAGTGTGATGATAAATTGGGGAGGCTGCACCAG<br>ACTGACTCGAGAATGATGTAGTGAAGAACGCCACG<br>ACCGTCTGGAAGATTTGAAGTAGAACCGTTCAGAGAA<br>GACTGCAAACAGAACTCTGTTATAATTTACATCAATTGT<br>GAAAGGCGAAAAGCACAAATCAATATCCGACAAAAAT<br>TATAATGATGATAT  | 100.1                  |
| CaSNP87 | <i>Ca-desi</i> -chr01 | 14093206                | (T/A)     | TTTGCTAECTTTGCCAECTTATGGGCCTCTCTACAT<br>TATTTTGTCTACCAATGAACTGTCAGAAGCATGTCT<br>AAAATAAaCATCAGATCATTACAATCCAATTACACTT<br>CTATGCTTTAGATATTTTGTtCGgCTGCCAaTTGAAGG<br>CACCAGCACACCAAGAGCTTCTGCCGTATACGAAT<br>CTGAGGCAATGCA        | TCTTTTCTGCAAGCTGCCAAAGAAAACAACCCATTGG<br>ATCTTTAAAAaCACATCCCCACGTGGTAGGGCCATCCA<br>GACAGCCCCcCATCAACCTGTGCAGTAAAATTAGCAG<br>TGACAGTTCTGATTTATGGTATGCTTTCCTGCAGAATGT<br>CATTCCCCTGCTTGGTTAAAATTTGAGACAAAATCACAA<br>GCACTCCTA  | 100.9                  |
| CaSNP88 | <i>Ca-desi</i> -chr01 | 14114903                | (A/C)     | CCATCCCCCTTGCCCTTTTCGGCCCTTTGACTACTAA<br>TGATAAGAGATGGTGATGTTAATTATTAATATCAATA<br>ATAAATAAAGAAAAAGATAAAAAGAAATCACATATAT<br>GCAGCCGAATACAACCAATACCAATACCCTCTTAAGA<br>ATAAGAGAATTATTATATATCTGGCGAGCGGGTTTTG<br>GCTTTATCATCTTGAT  | TCCTCGTTATCTTTATCTGCGATTGCCATTGTCAATGCTA<br>ATGGGCGCGCGCTCAATTCAATTGTGCGCGTACCTGC<br>AGCATATAATTATAATGTCAAATCCTTAGTTGTTGGAT<br>ATTATTACTTTTCATGTGCAAGCATGTCAATGTCATATTC<br>AGATGTTGAGGCGTTGTTGAAGTTCAAGGATTCATTAA<br>CAAATGT | 101.8                  |

Markers localized at the major seed weight QTL interval (*CaqSW1.1*) are highlighted with red colour
