# Supplementary material for: Deploying QTL-seq for rapid delineation of a potential candidate gene underlying major trait-associated QTL in chickpea
Source: PubMed Central journal article supplement (PMC4463844; doi:10.1093/dnares/dsv004), 2015-04-27
Supplement: supp_dsv004_dsv004supp_table2.pdf [file supp_dsv004_dsv004supp_table2.pdf]

**Table S2: Structural and functional annotation of six protein-coding genes localized at the 35 kb genomic interval of a major SW QTL (*CaqSW1.1*)**

| <b>Desi gene IDs</b> | <b>Chromosome</b>     | <b>Start physical positions (bp)</b> | <b>End physical positions (bp)</b> | <b>Directions</b> | <b>Putative functions</b>                 |
|----------------------|-----------------------|--------------------------------------|------------------------------------|-------------------|-------------------------------------------|
| Ca_00071             | <i>Ca-desi</i> -chr01 | 836065                               | 839806                             | plus              | COP9 signalosome complex subunit 8        |
| Ca_00072             | <i>Ca-desi</i> -chr01 | 840671                               | 841007                             | minus             | Putative uncharacterized protein          |
| Ca_00073             | <i>Ca-desi</i> -chr01 | 844344                               | 845613                             | minus             | Fasciclin-like arabinogalactan protein 19 |
| Ca_00074             | <i>Ca-desi</i> -chr01 | 847138                               | 848472                             | plus              | Vinorine synthase                         |
| Ca_00075             | <i>Ca-desi</i> -chr01 | 849660                               | 852957                             | minus             | Bidirectional sugar transporter N3        |
| Ca_00076             | <i>Ca-desi</i> -chr01 | 863532                               | 951771                             | plus              | Protein FAM135A                           |
